# Supplementary material for: Metavirome of 31 tick species provides a compendium of 1,801 RNA virus genomes
Source: PubMed Central journal article supplement (PMC9816062; doi:10.1038/s41564-022-01275-w), 2023-01-05

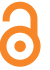

# Metavirome of 31 tick species provides a compendium of 1,801 RNA virus genomes

---

In the format provided by the authors and unedited

Alphalexiviridae

Group  
Ref  
Tick

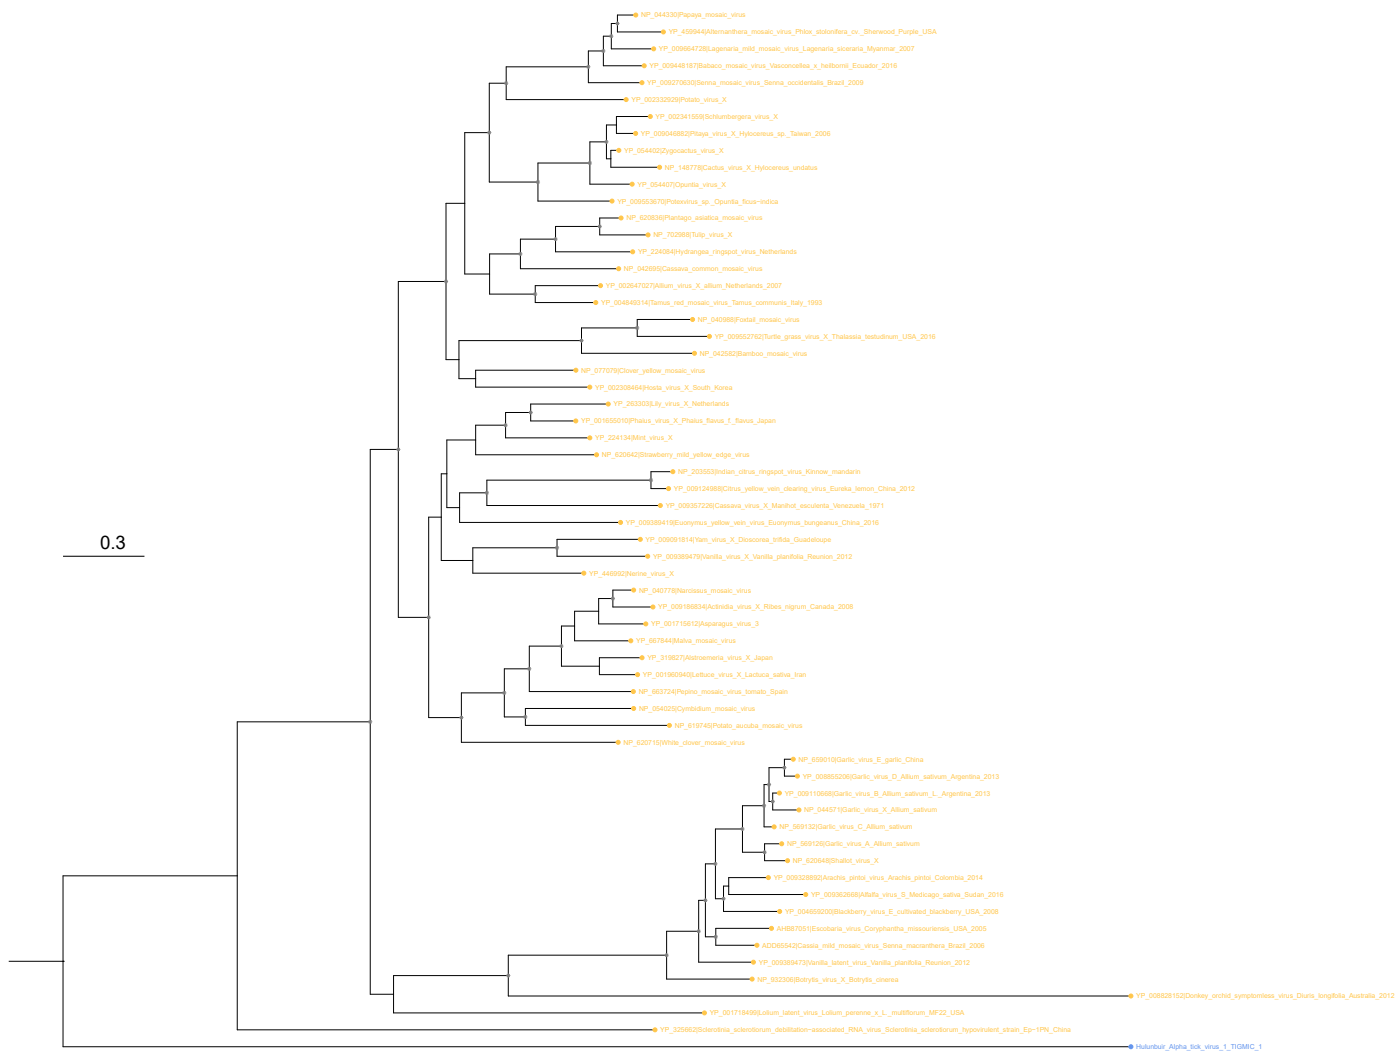

Astroviridae

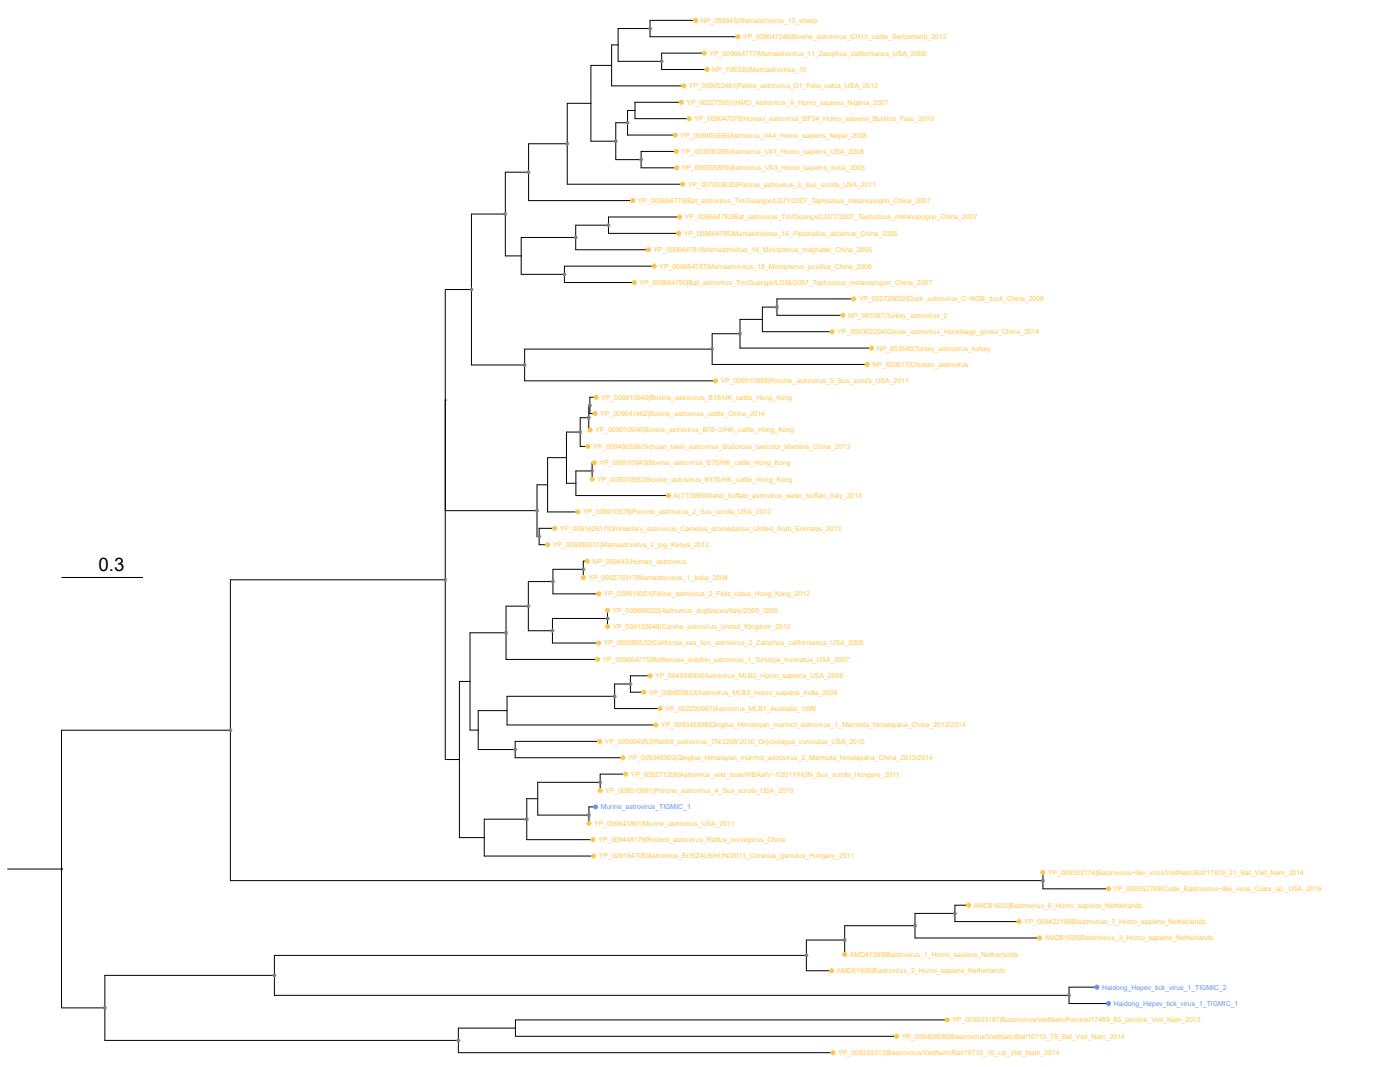

Chrysoviridae

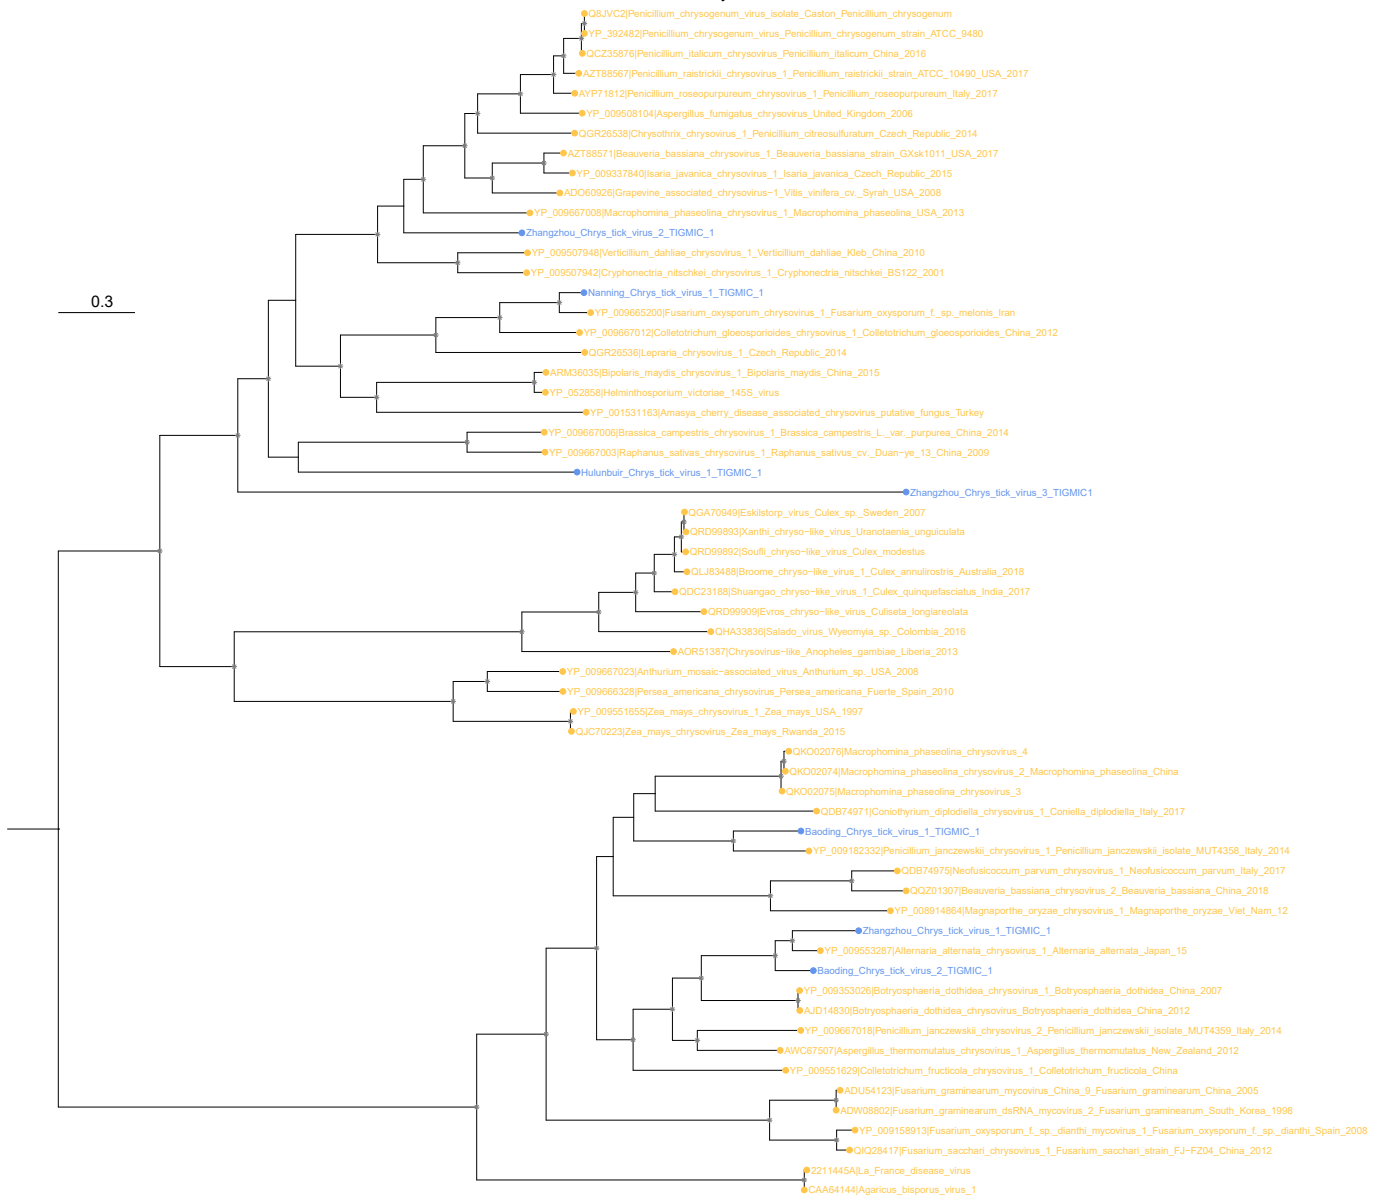

Dicistroviridae

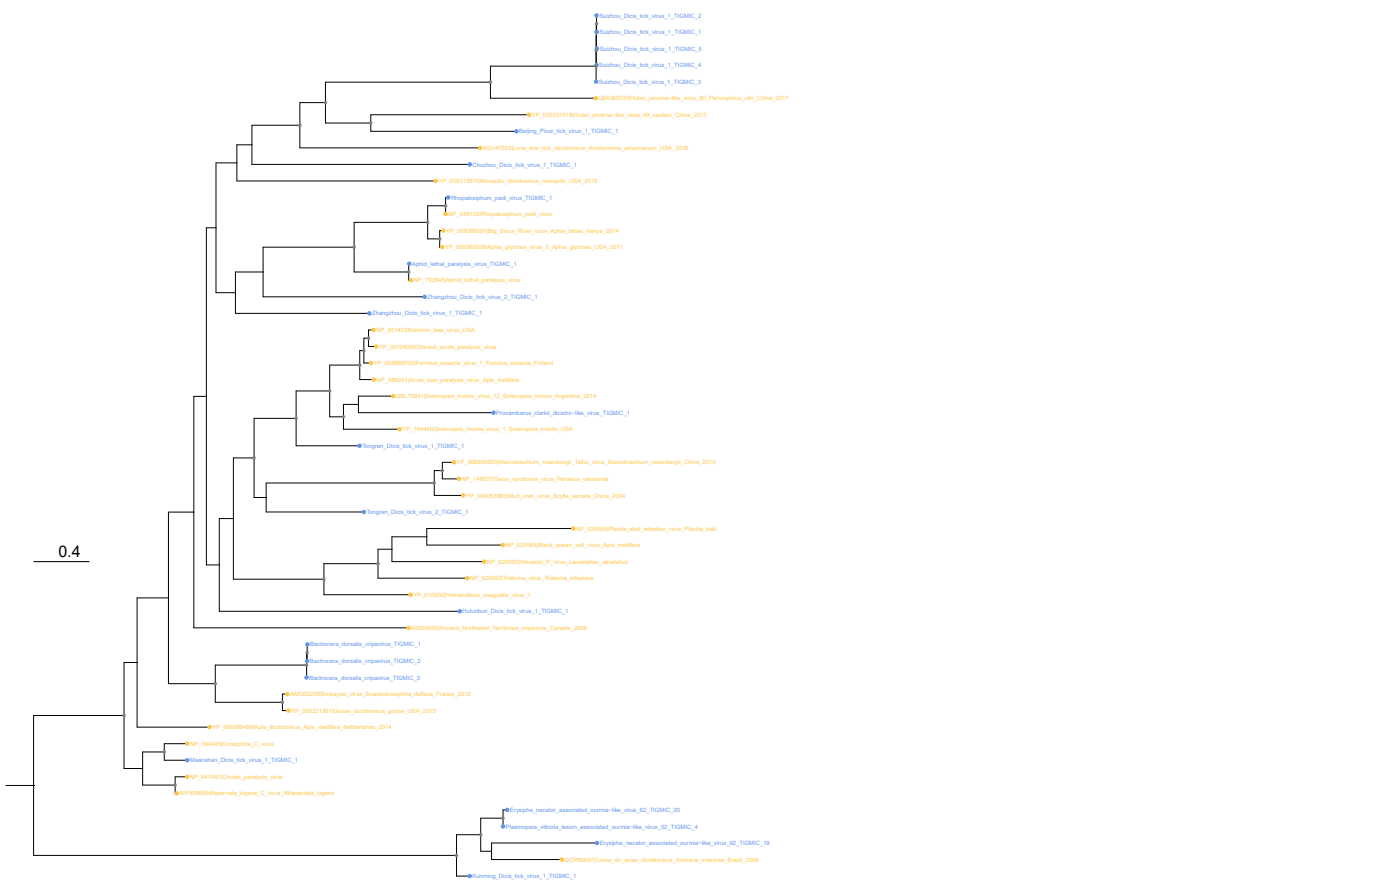

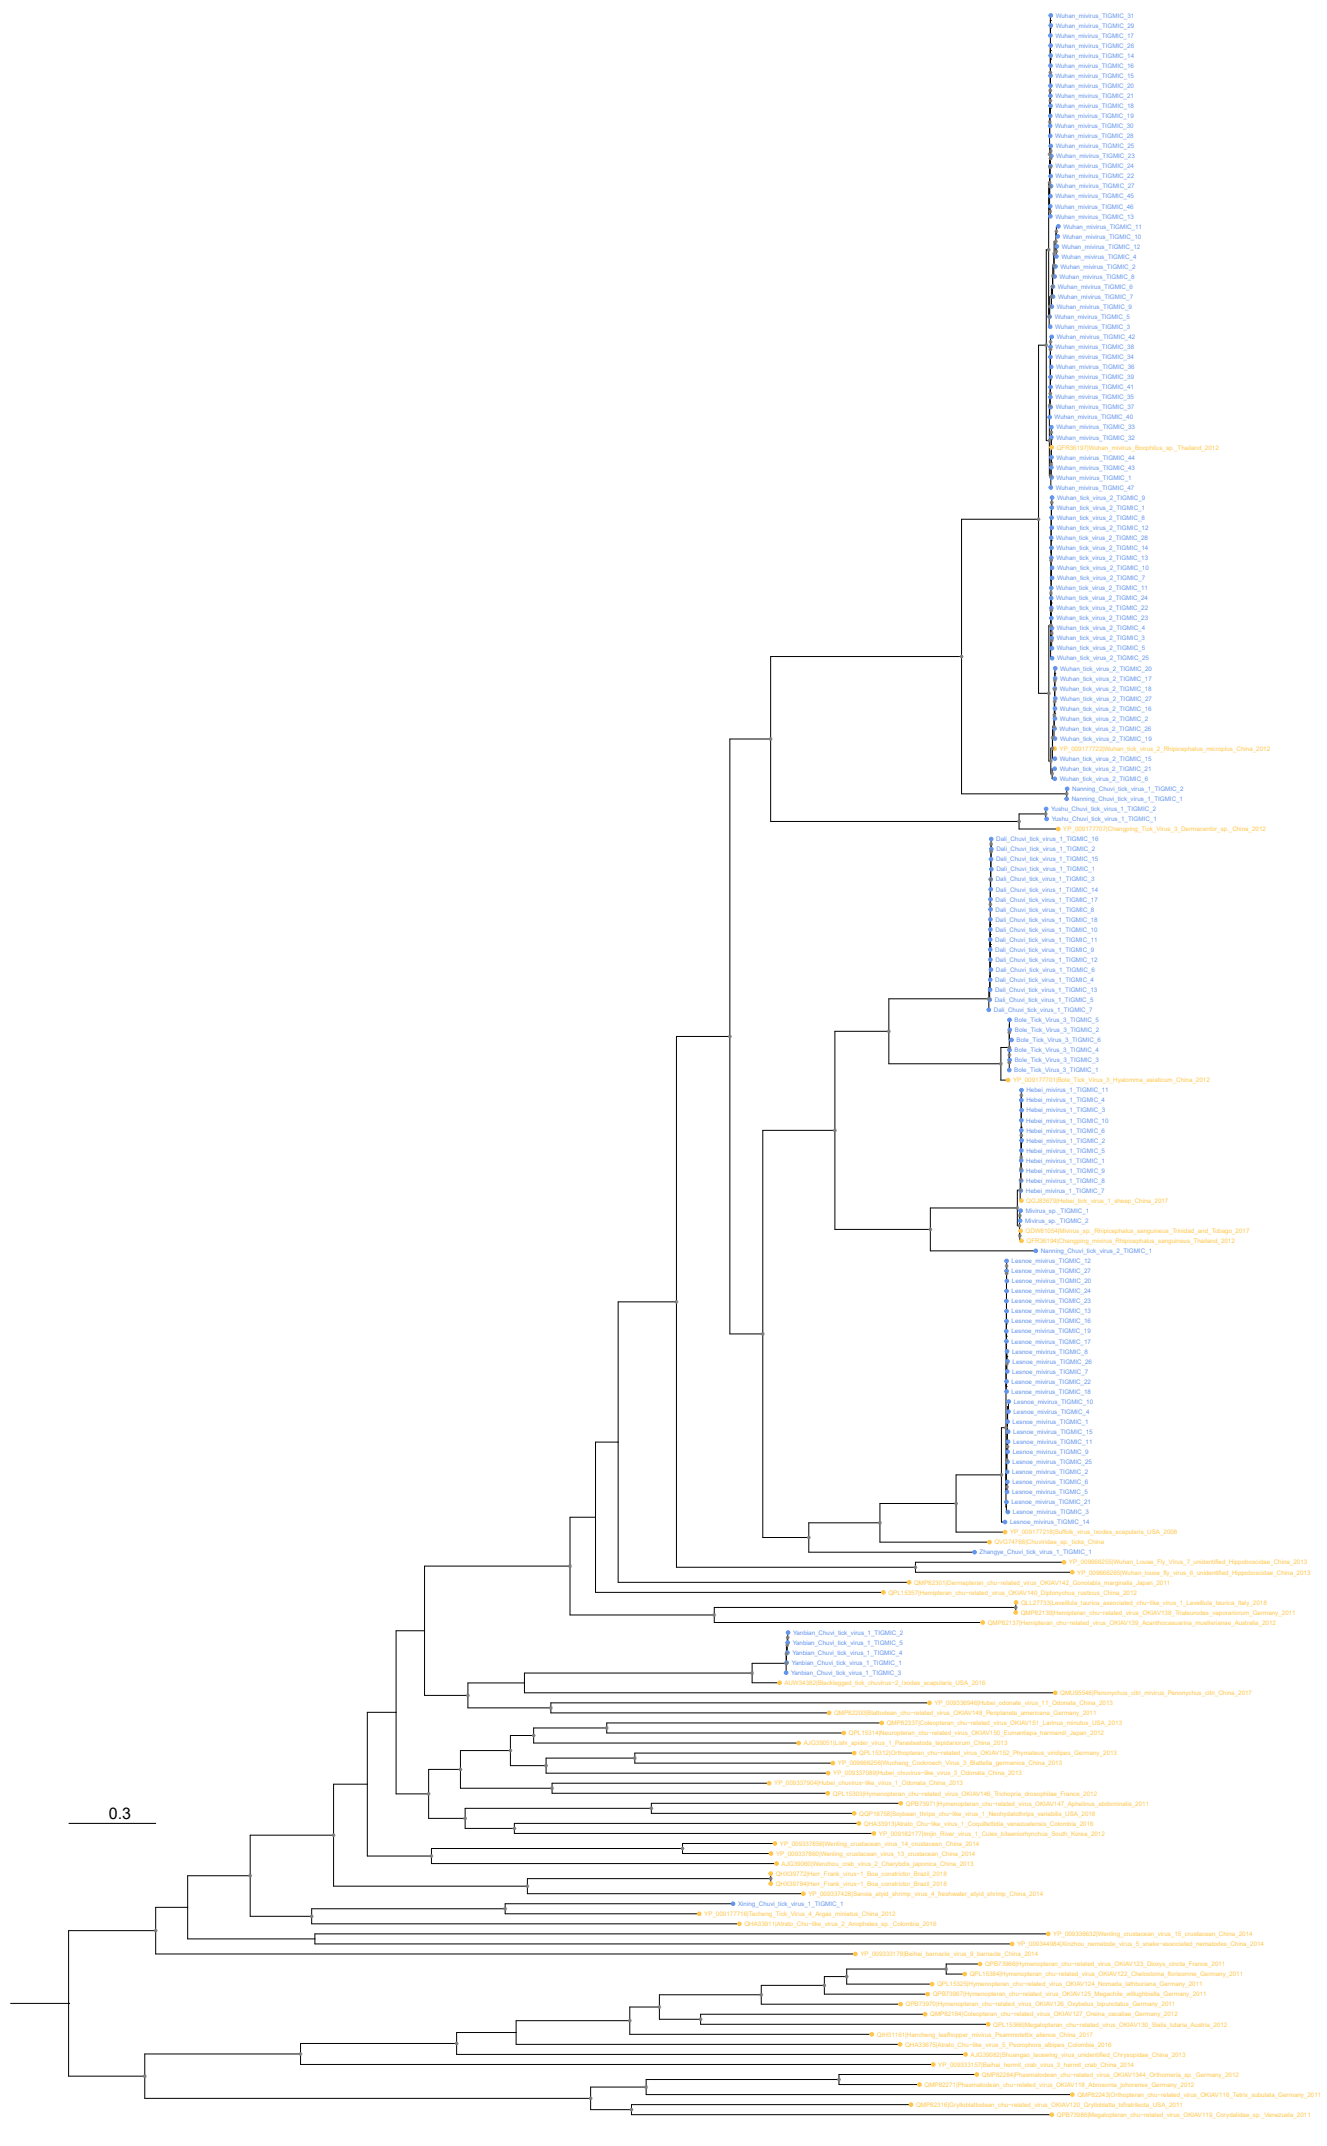

0.3

### Fusariiviridae

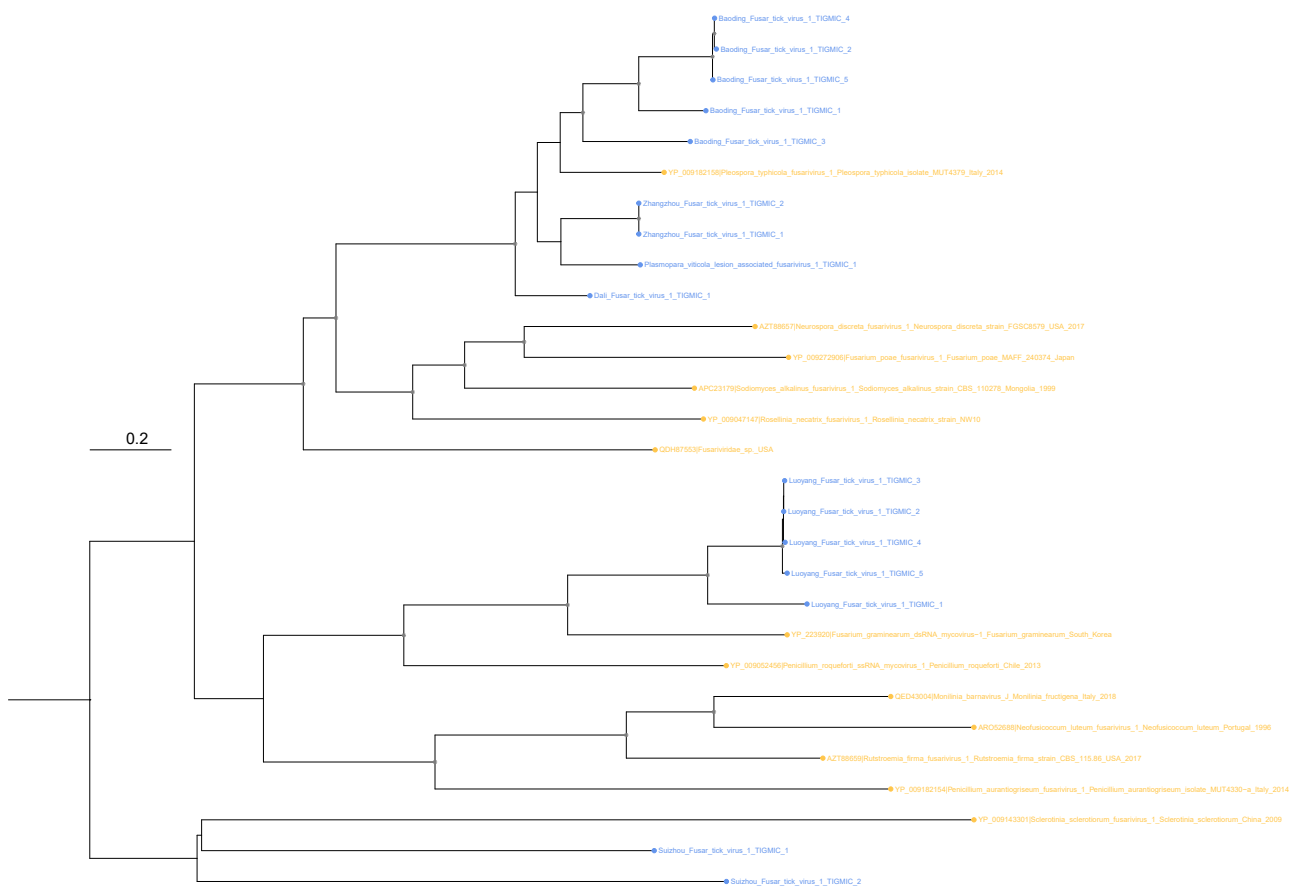

### Hypoviridae

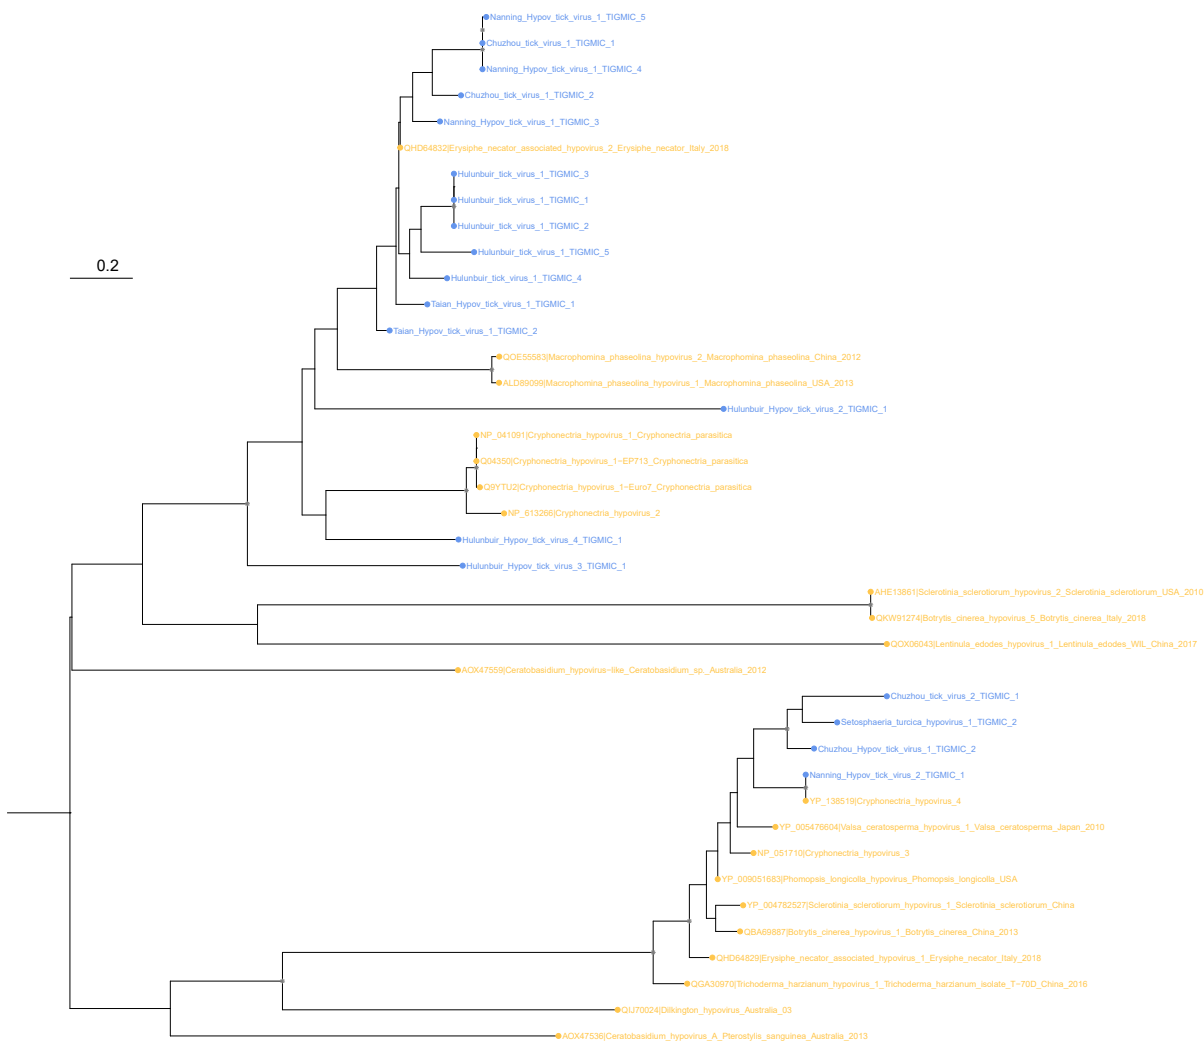

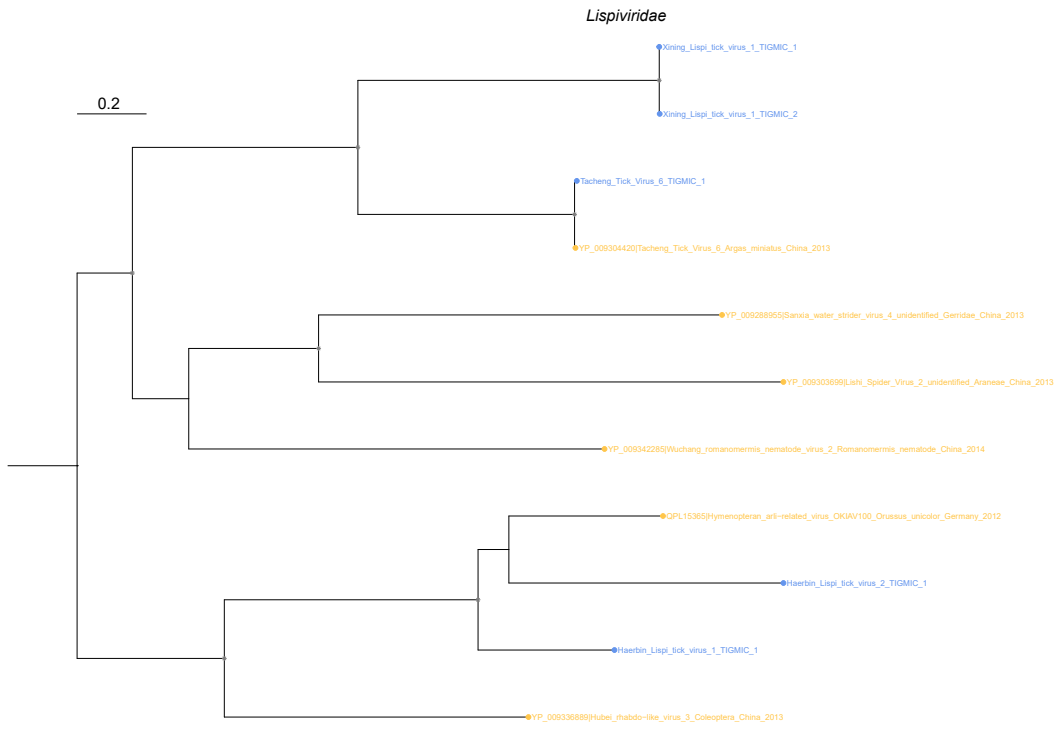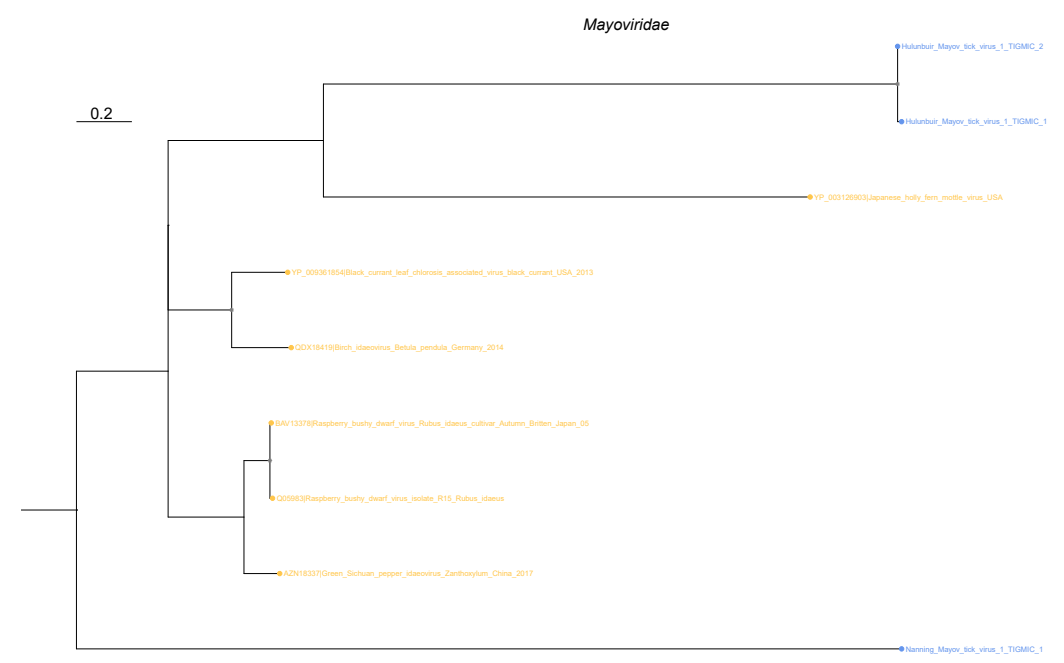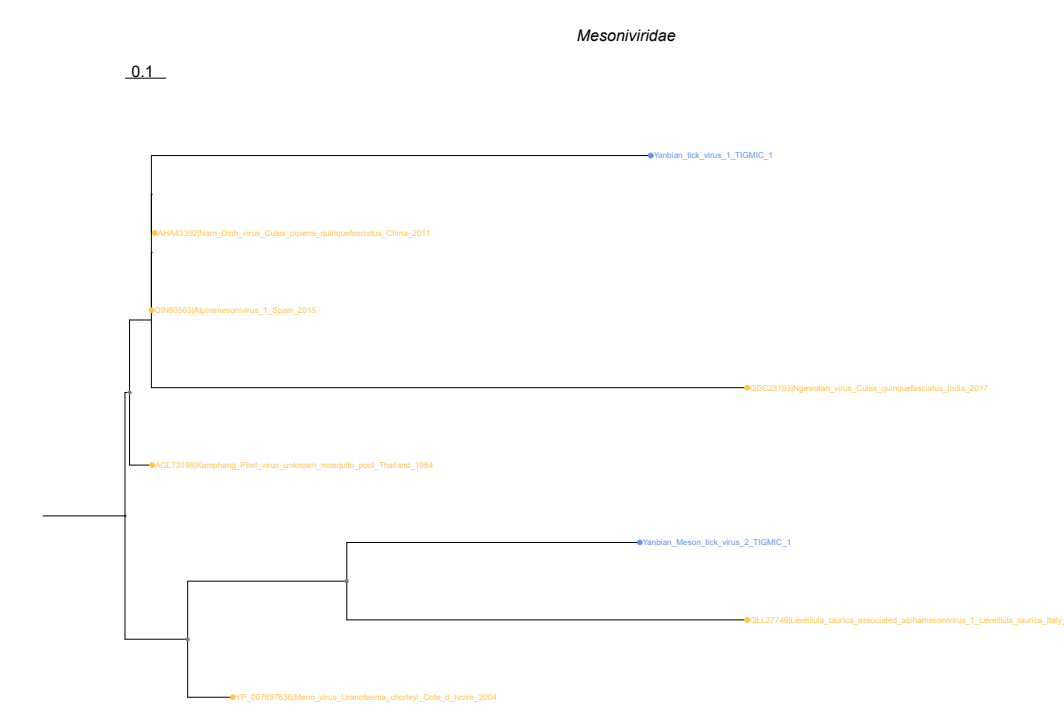

Myomonaviridae

Group  
● Ref  
● Tick

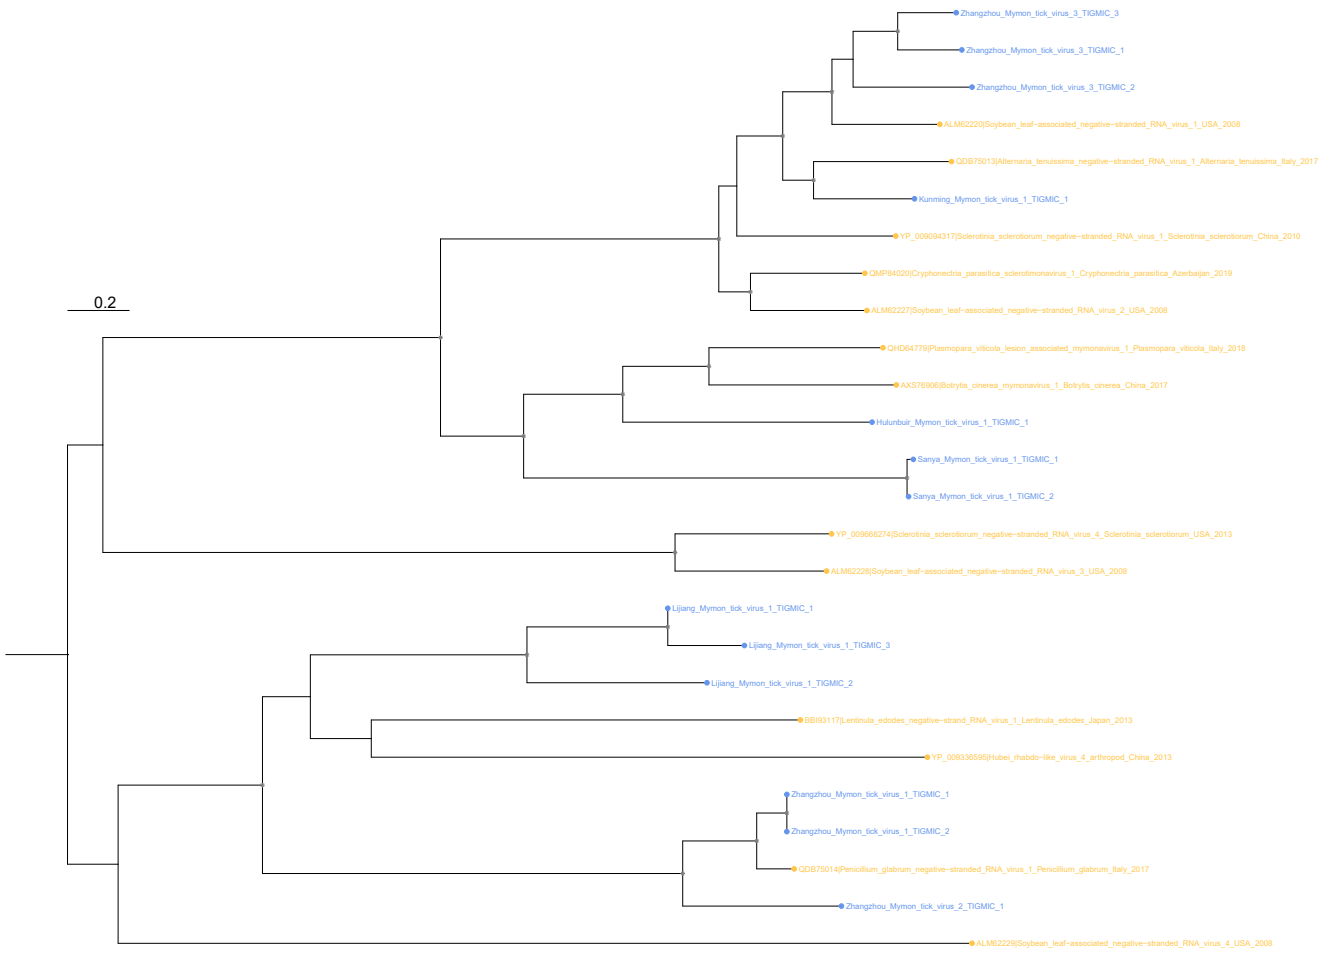

Nodaviridae

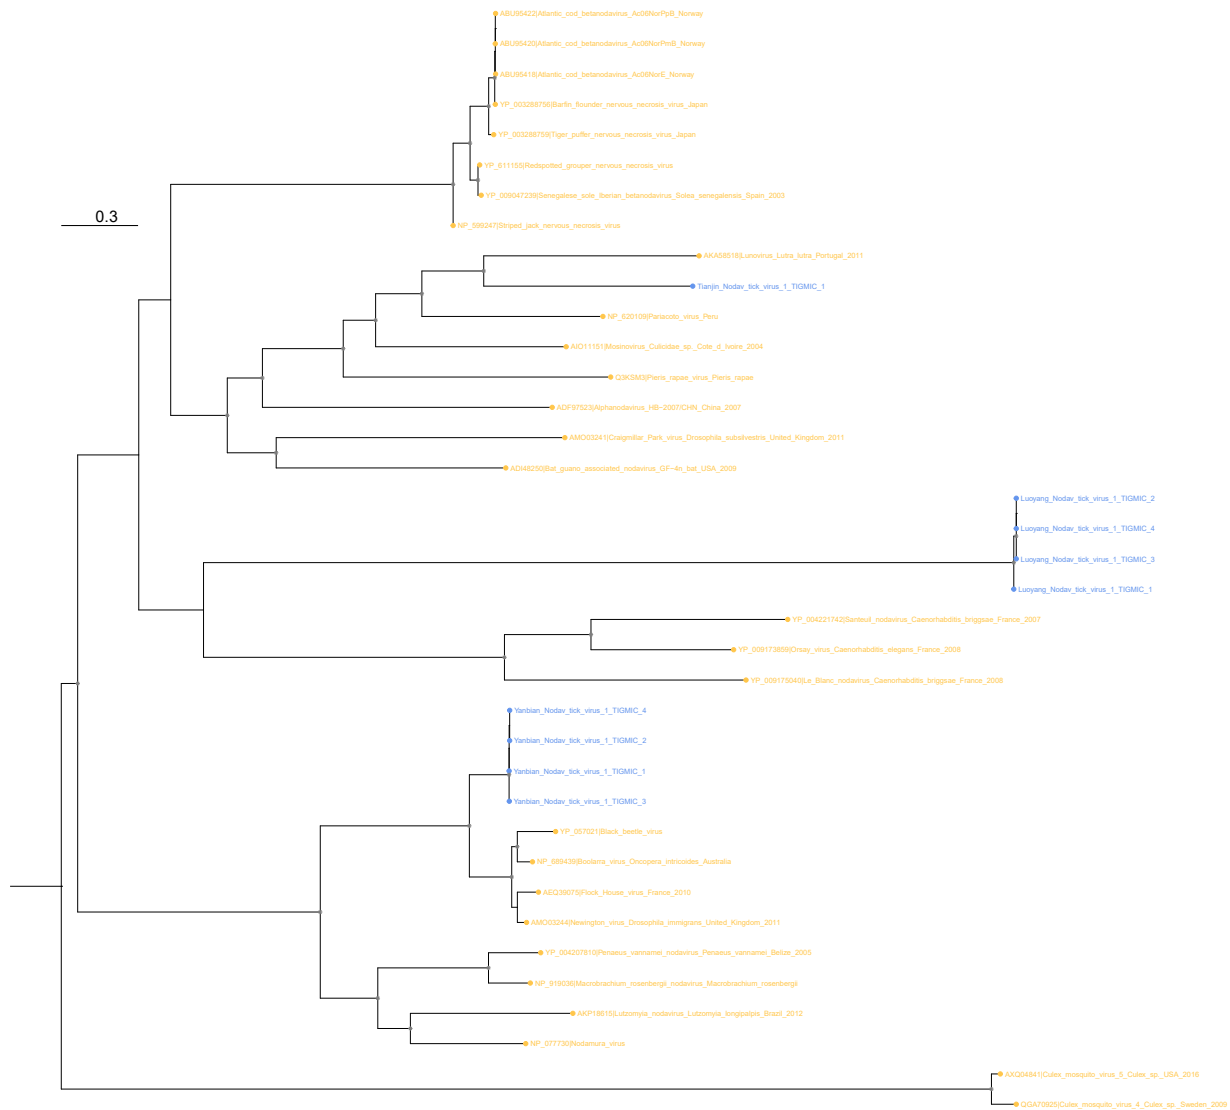

Sinhaliviridae

Group  
Ref  
Tick

0.03

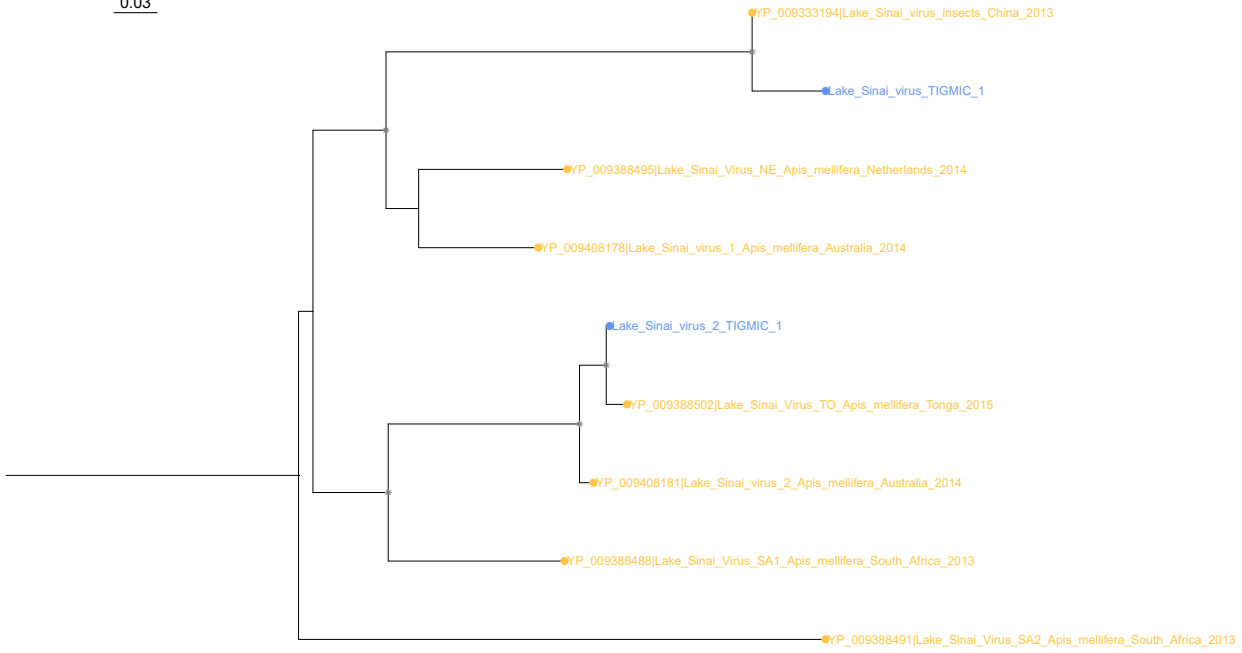

Tospoviridae

0.1

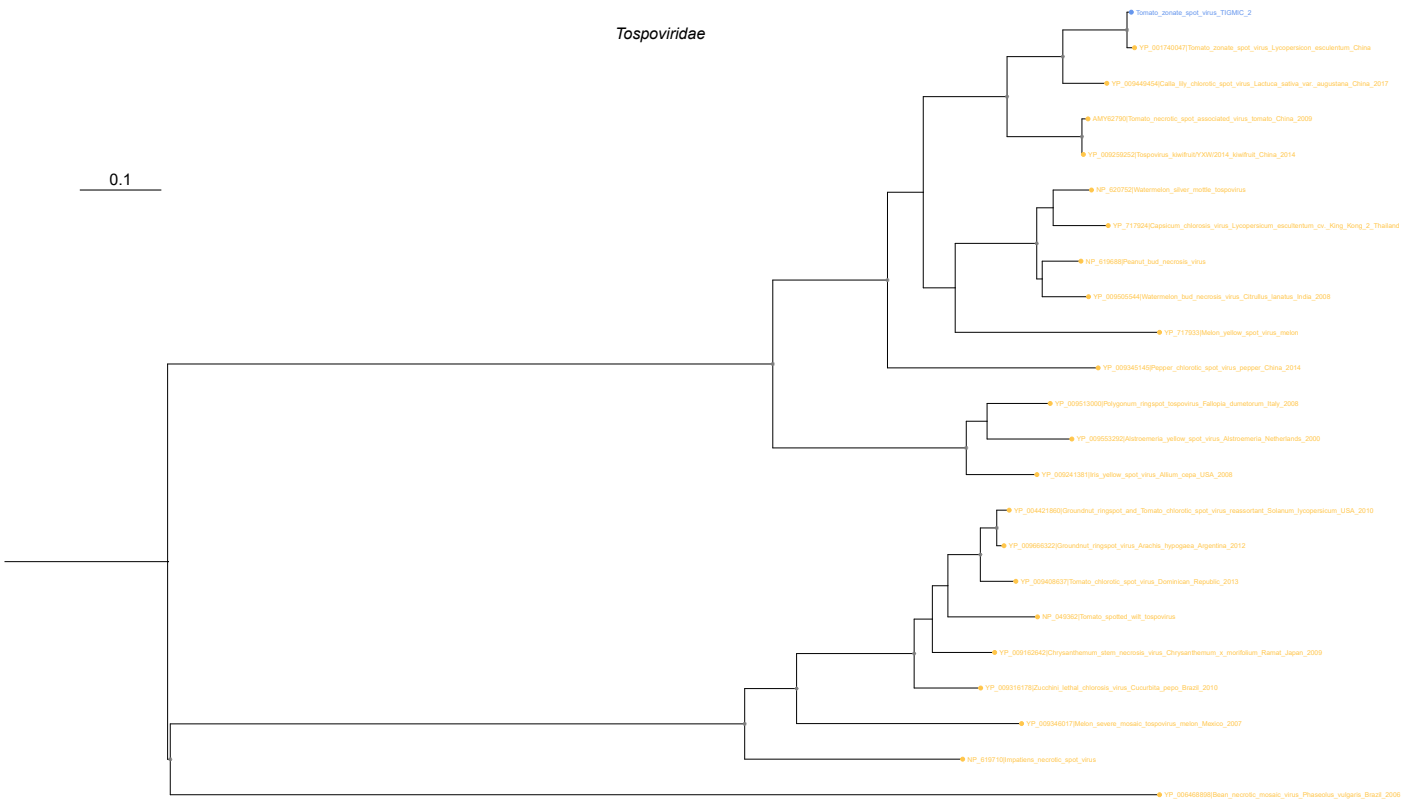



Virgaviridae

Group  
Ref  
Tick

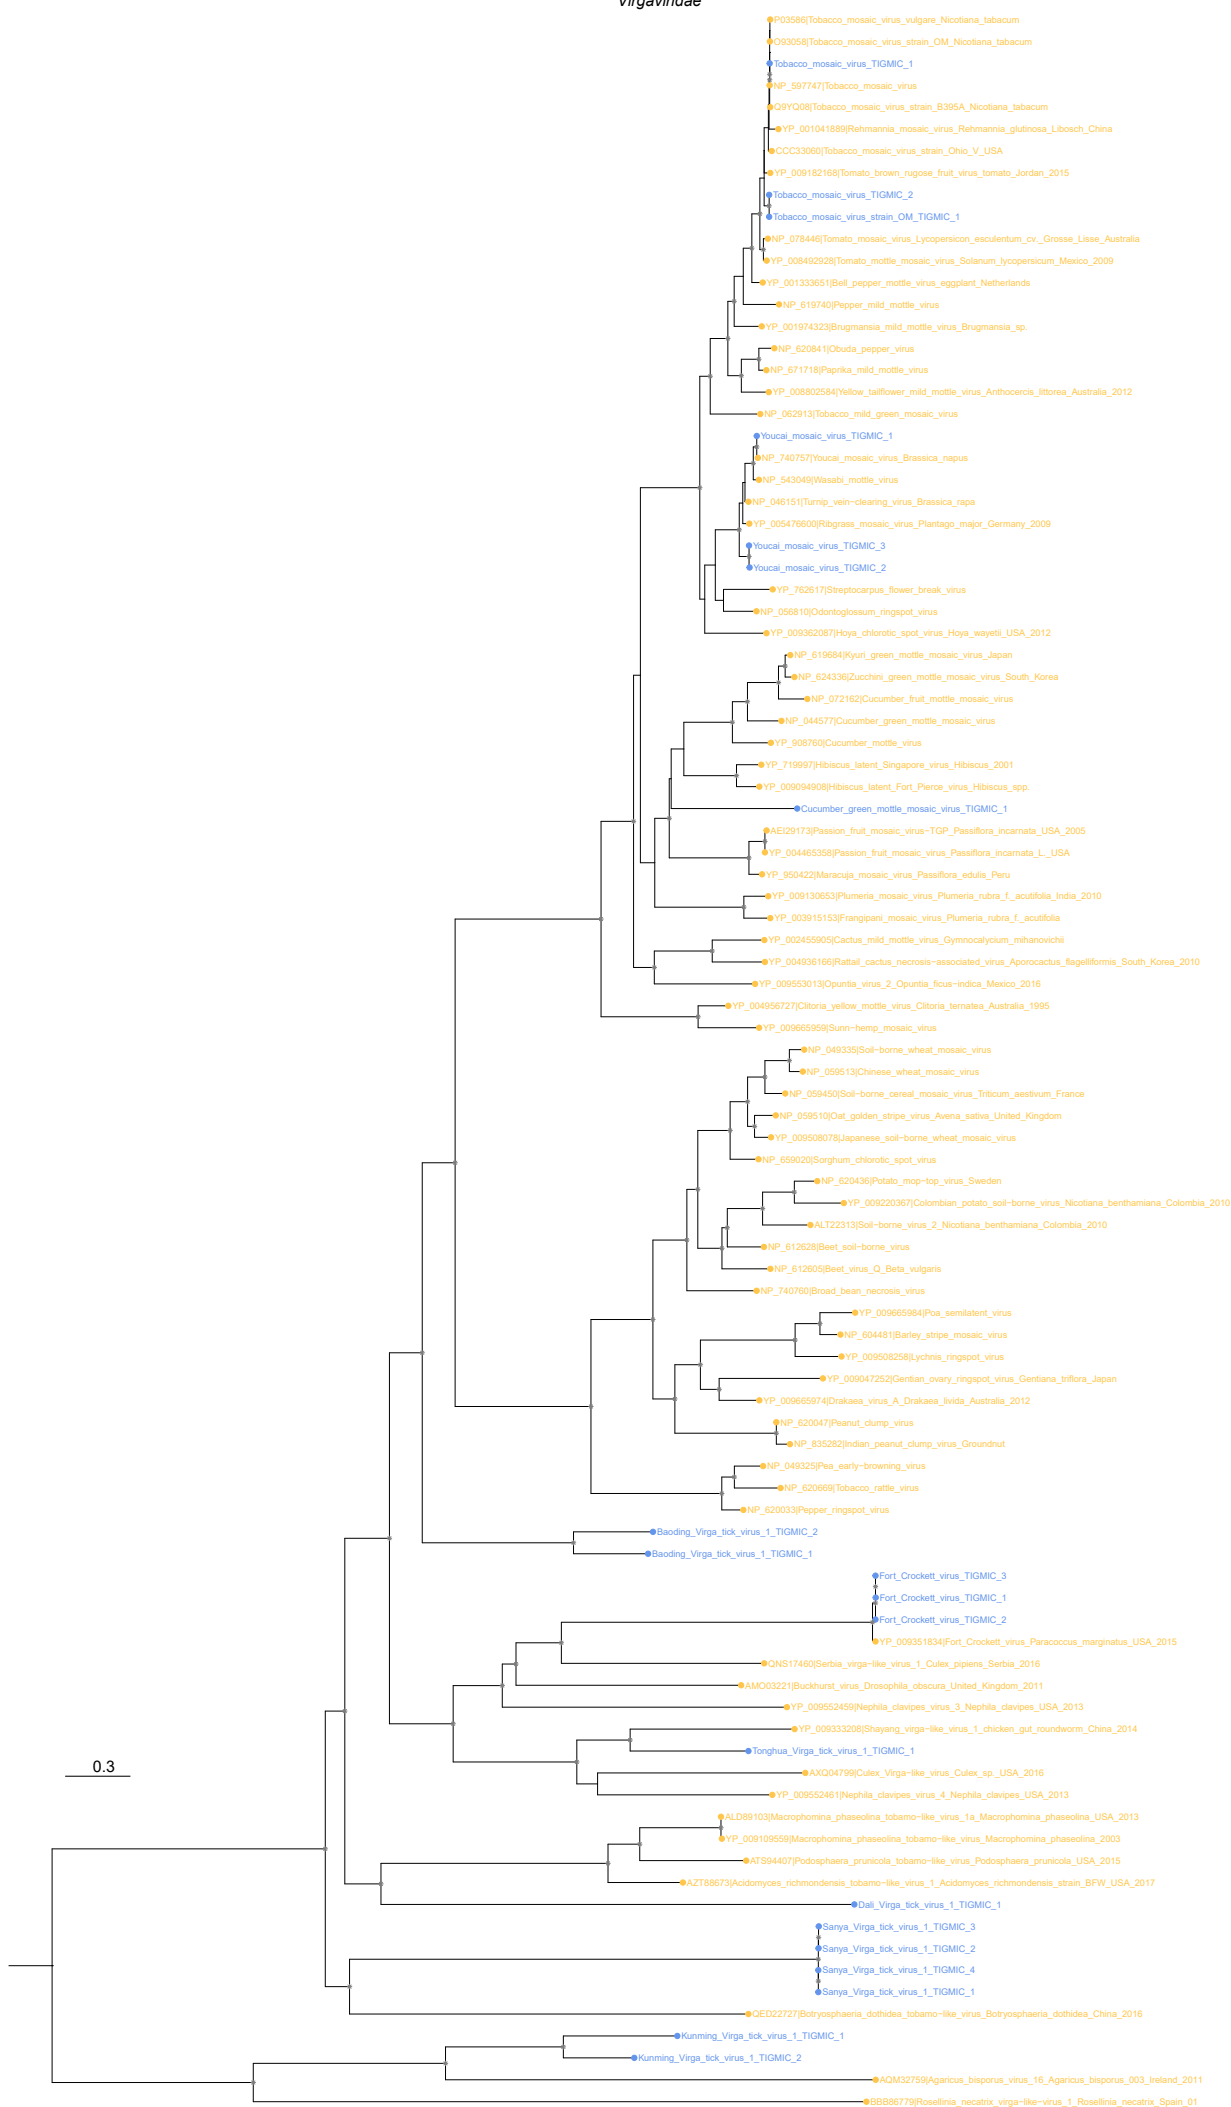

**Solemoviridae**

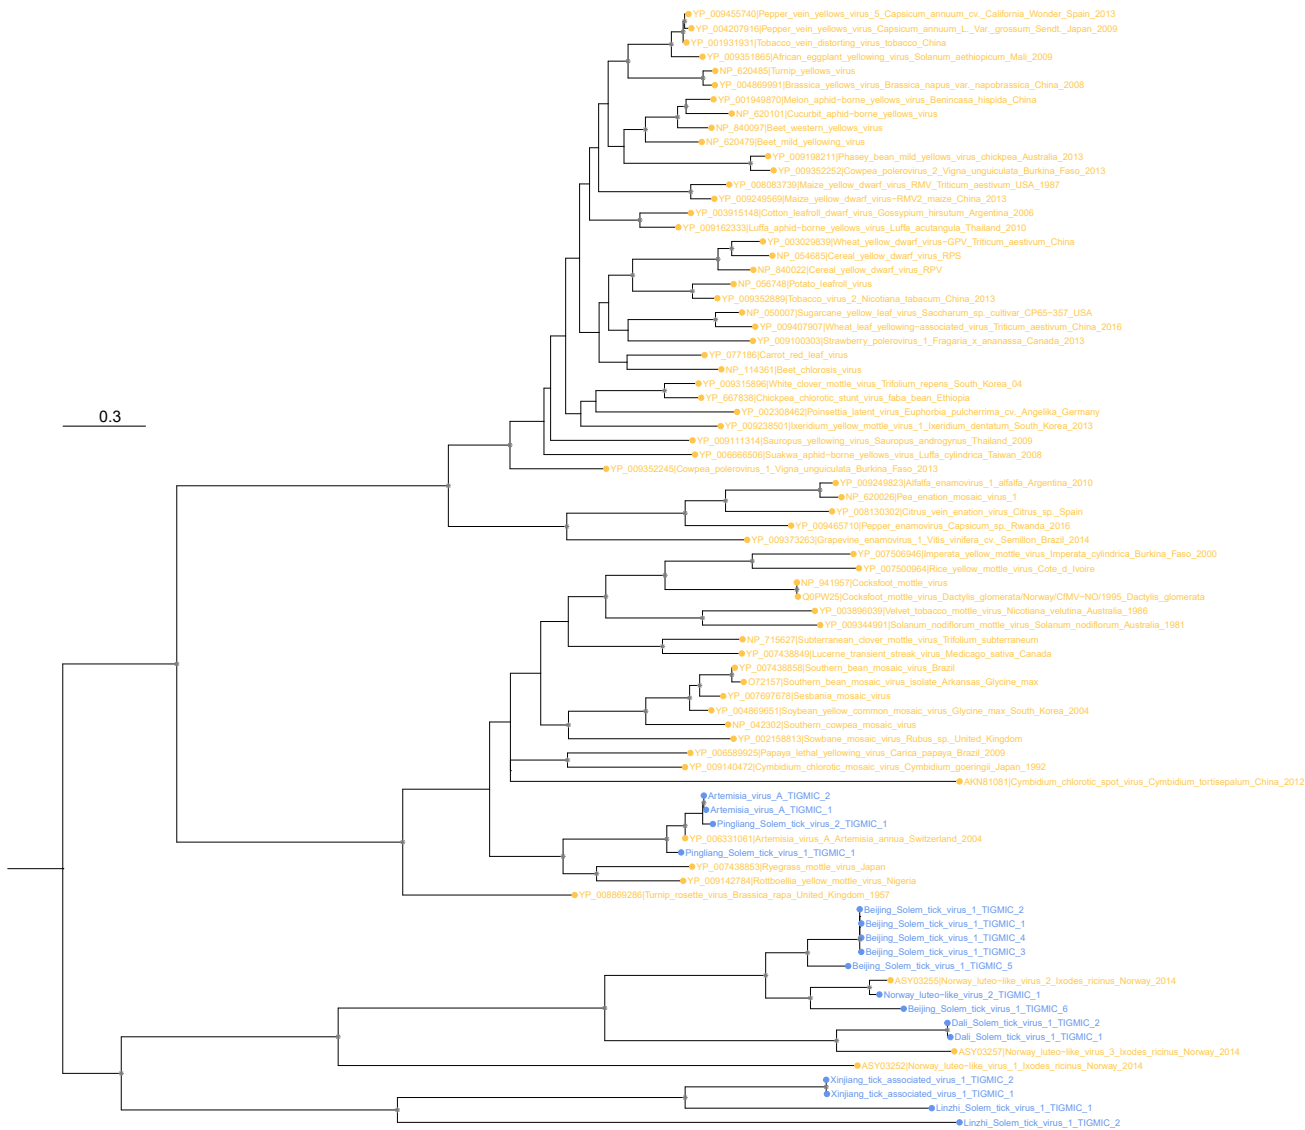

**Picobirnaviridae**

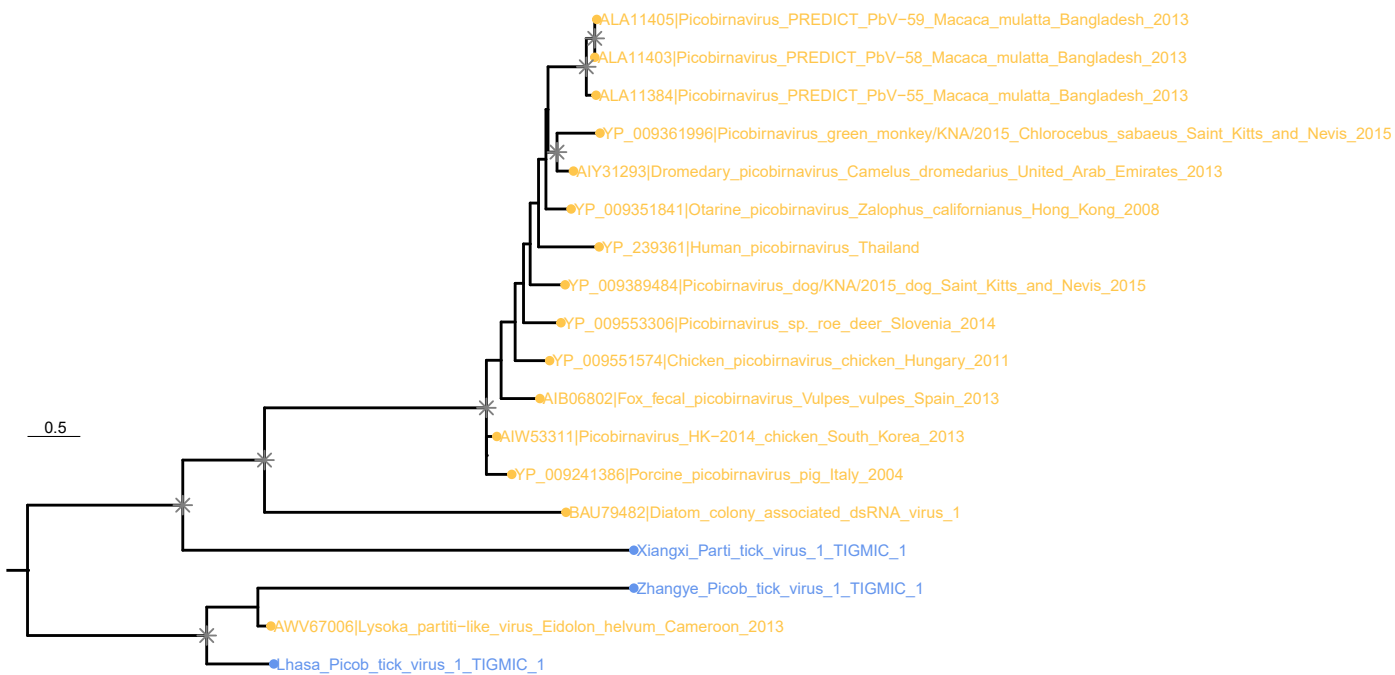

Bromoviridae

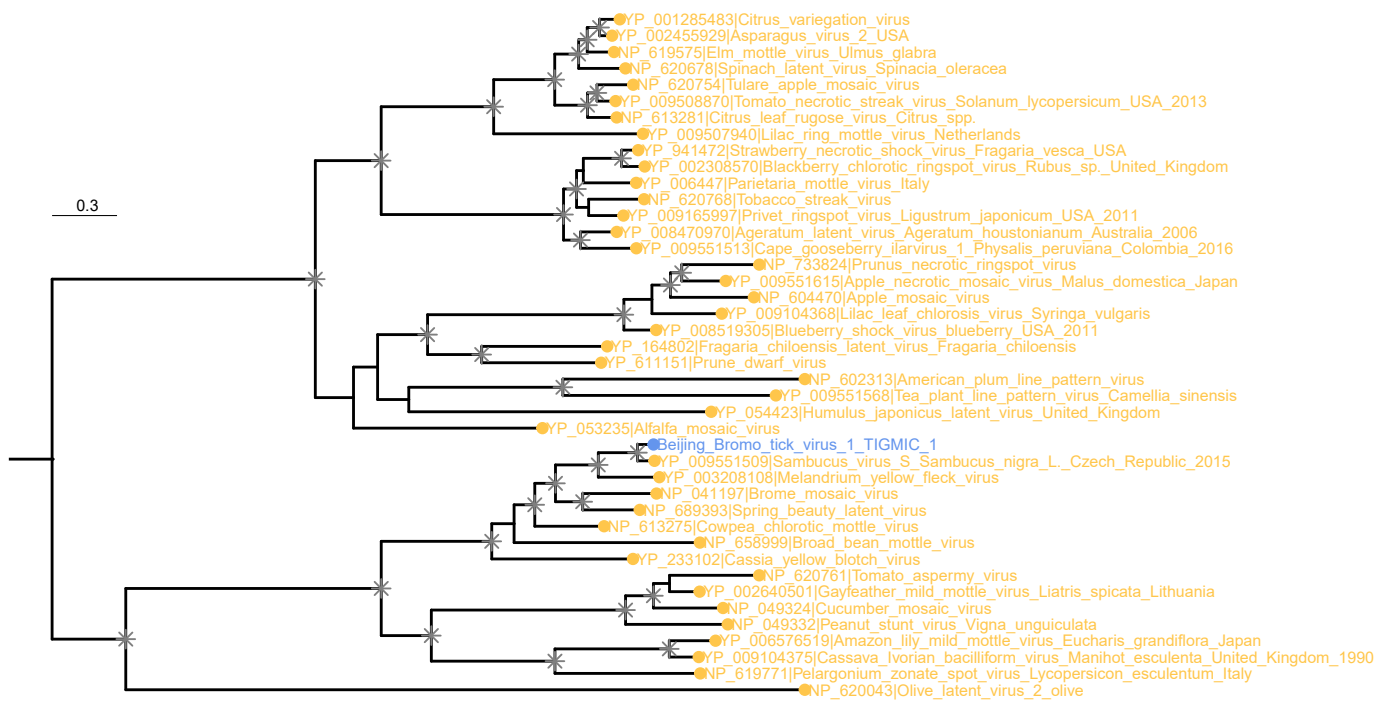

Deltafexiviridae

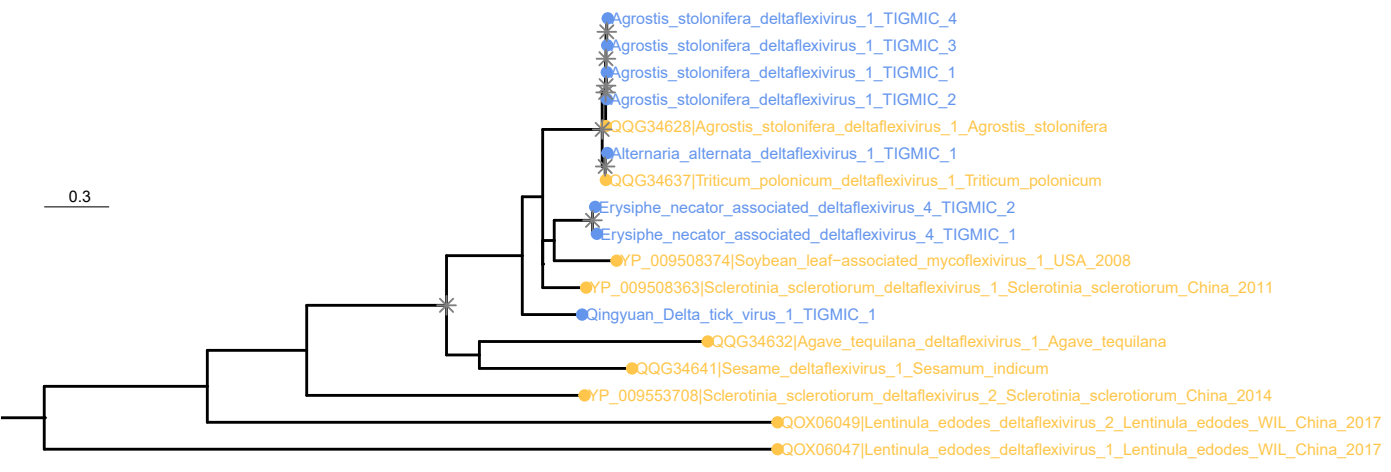

Endornaviridae

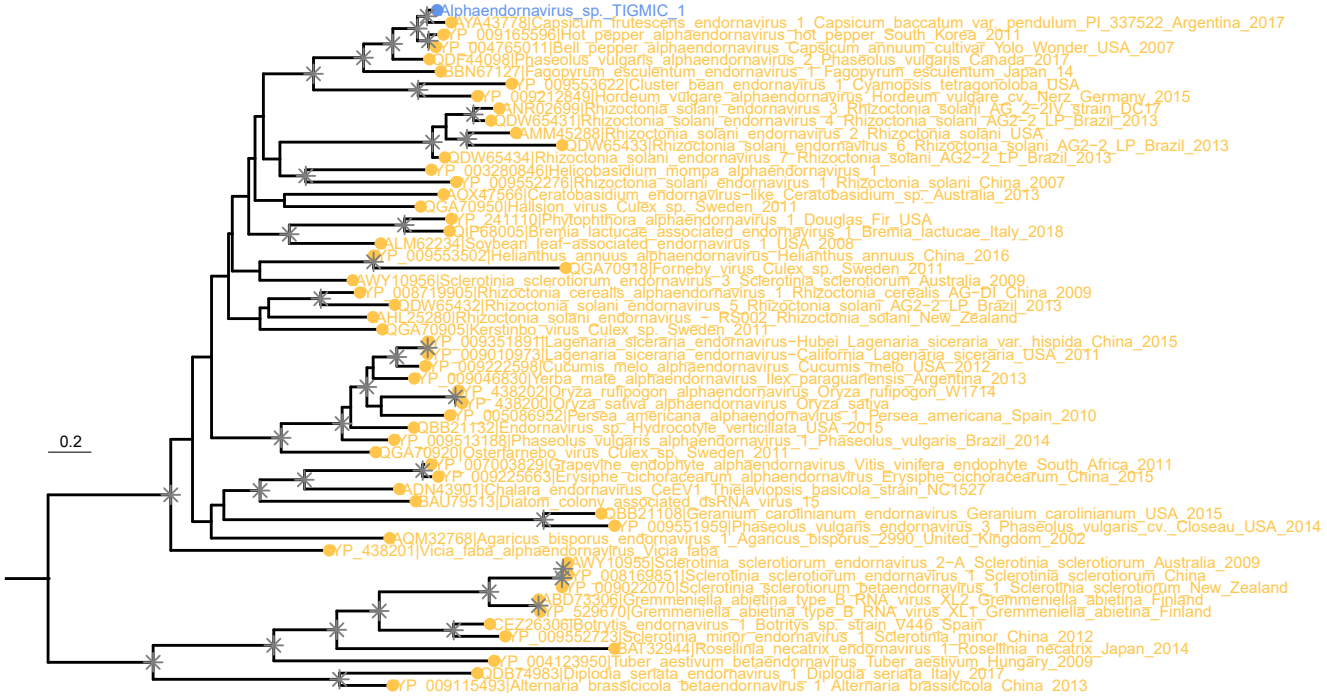

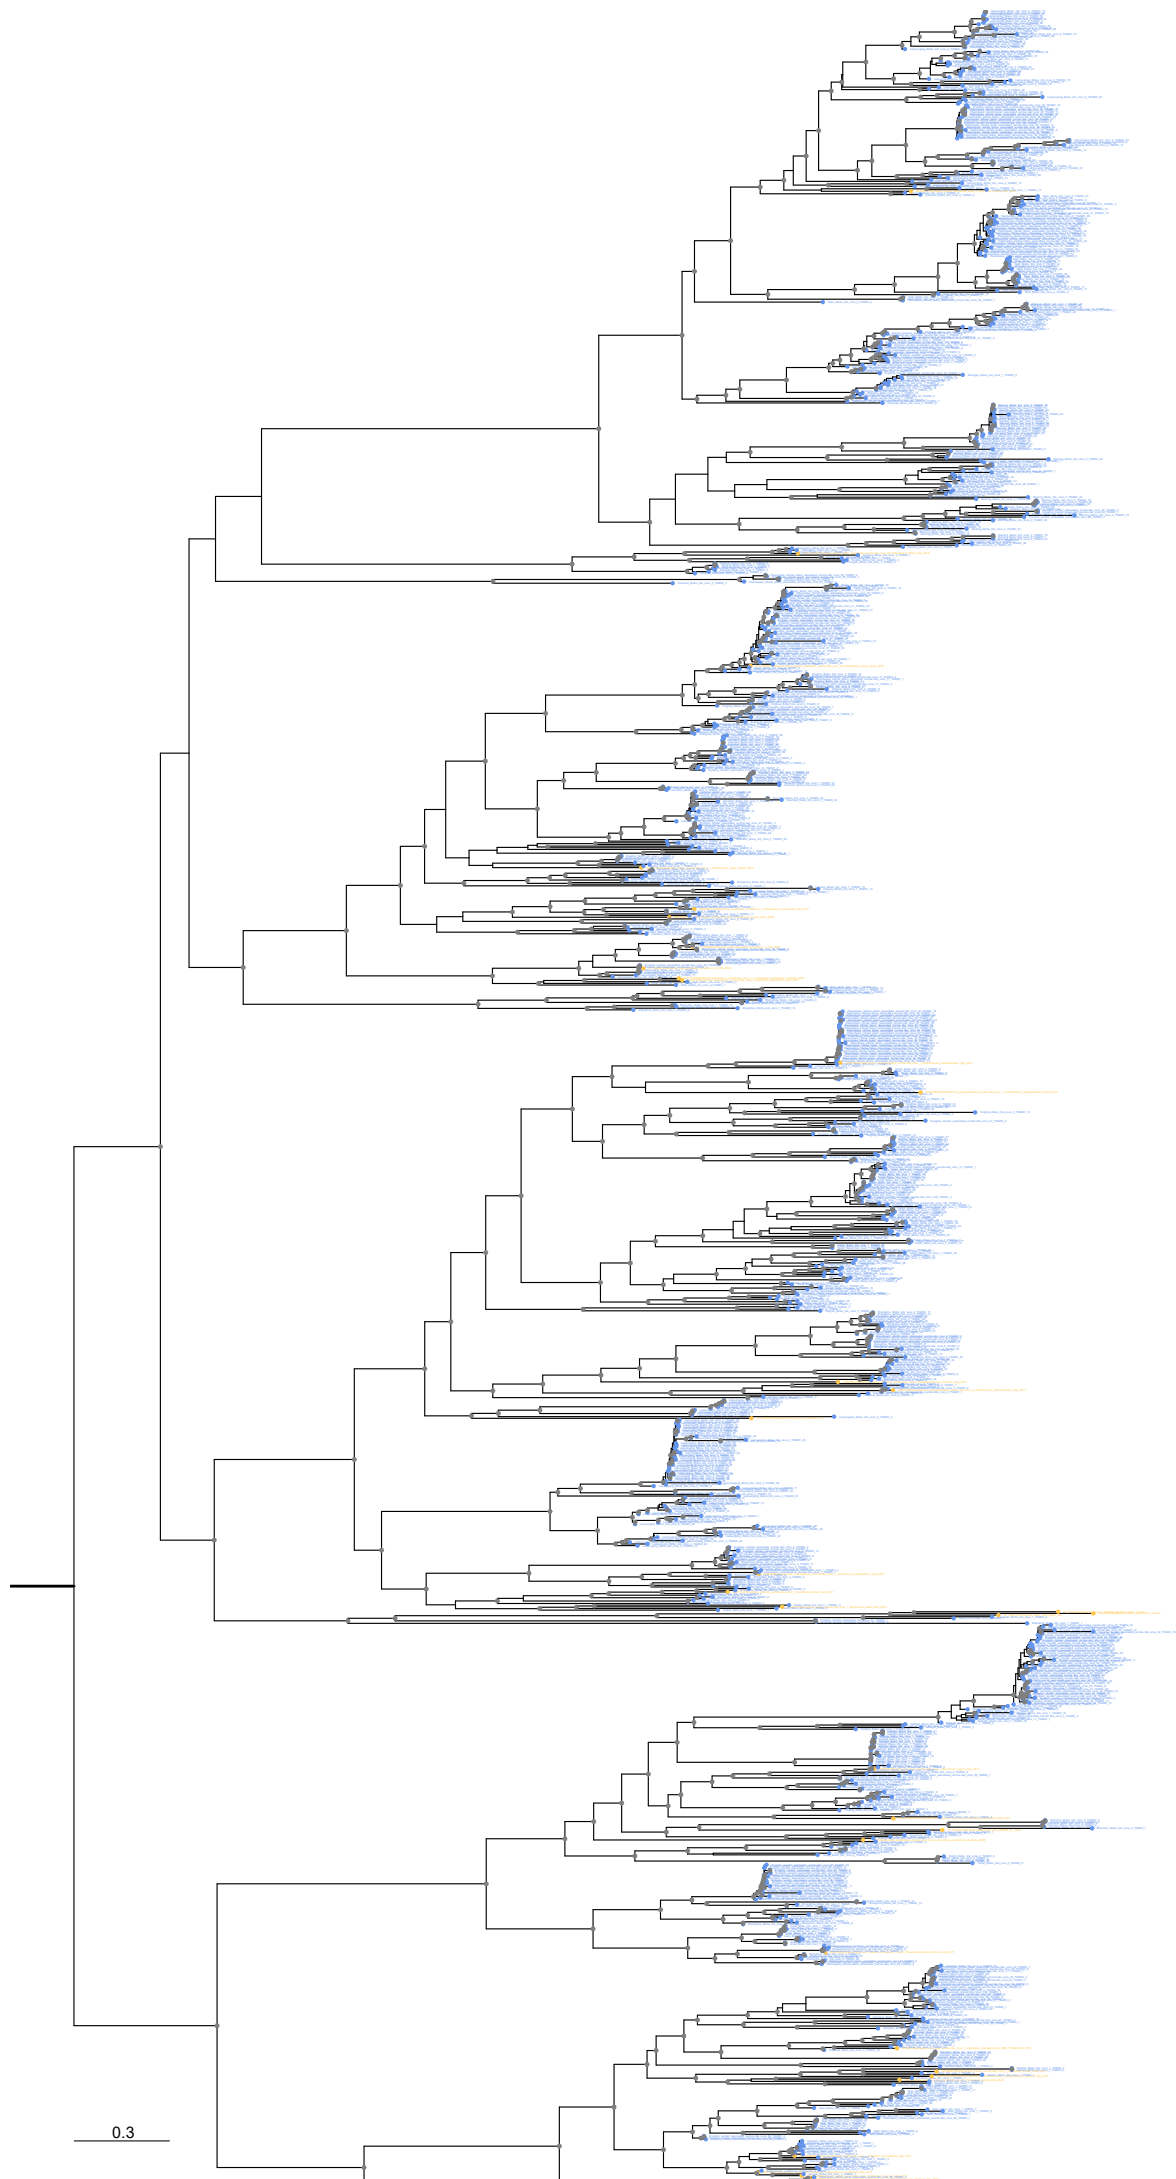

0.3

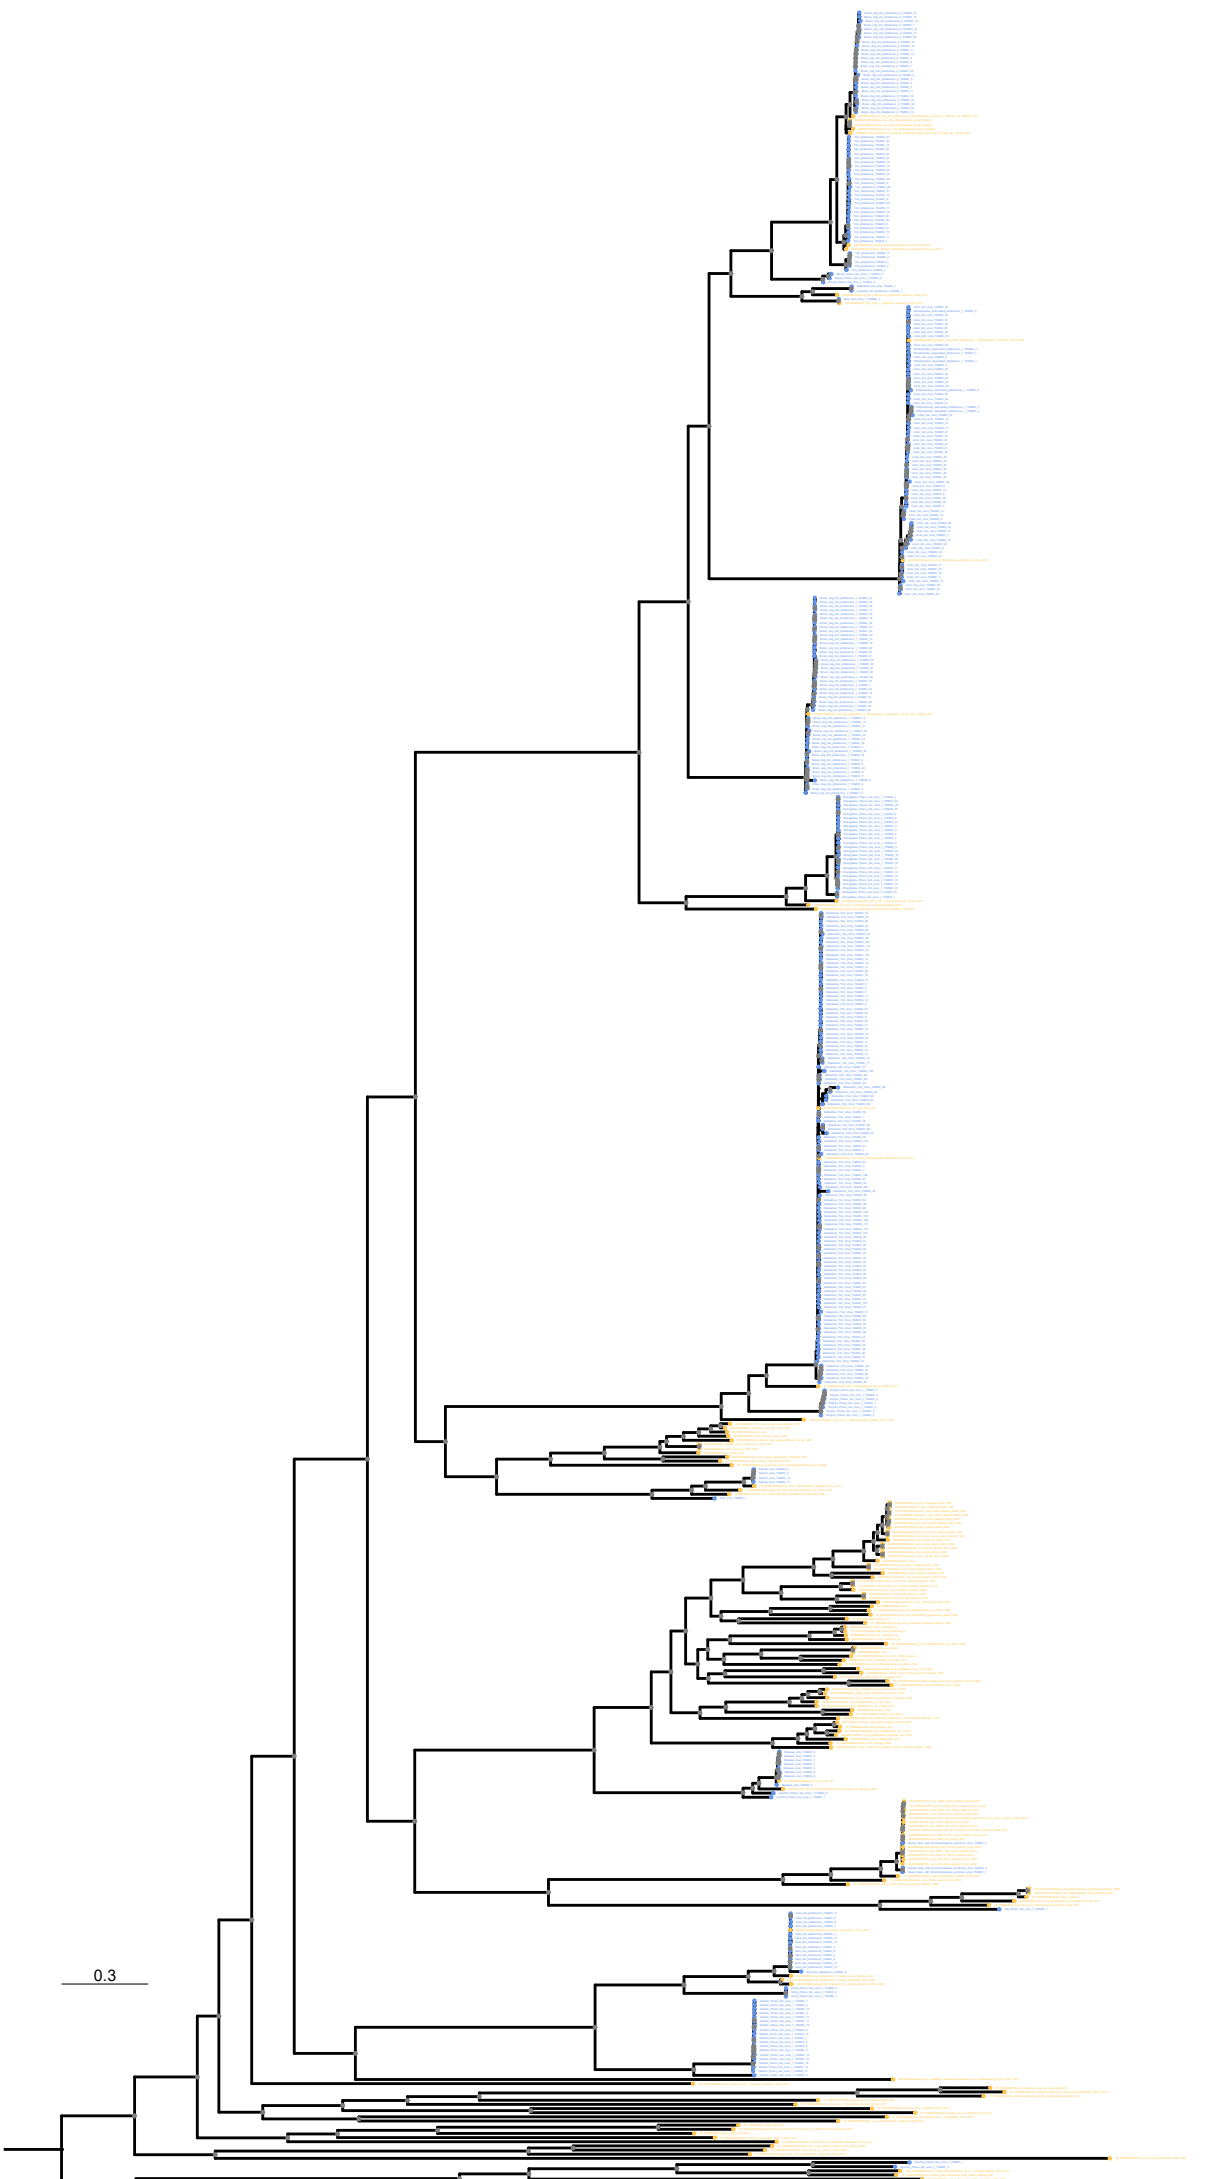

0.3

Reoviridae

Group  
Ref  
Tick

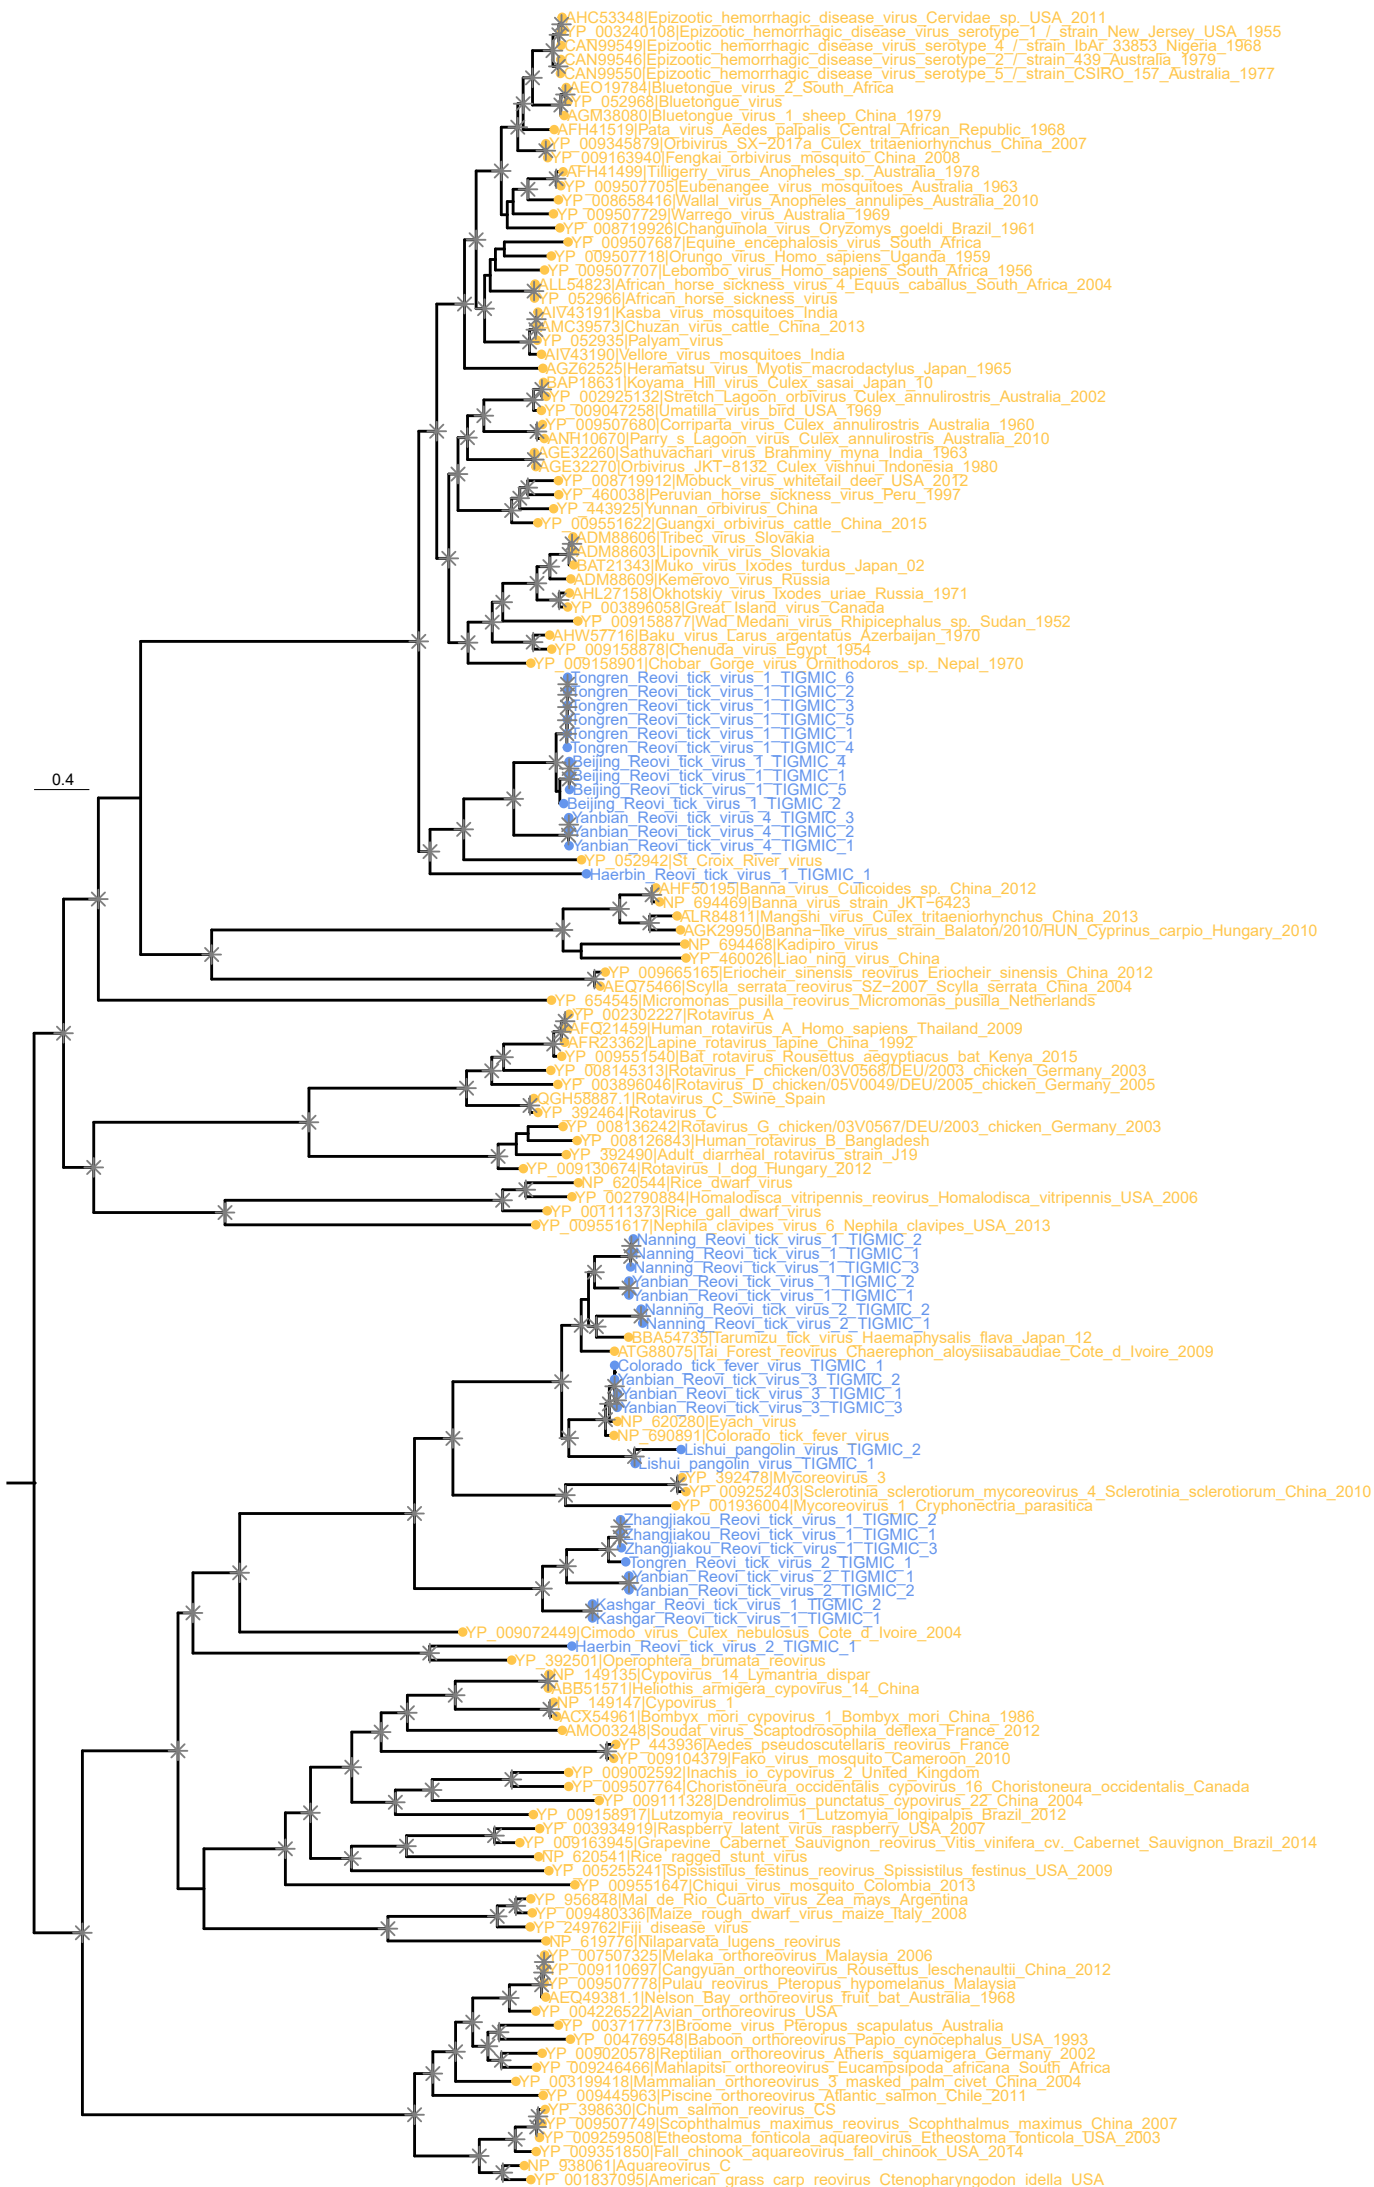

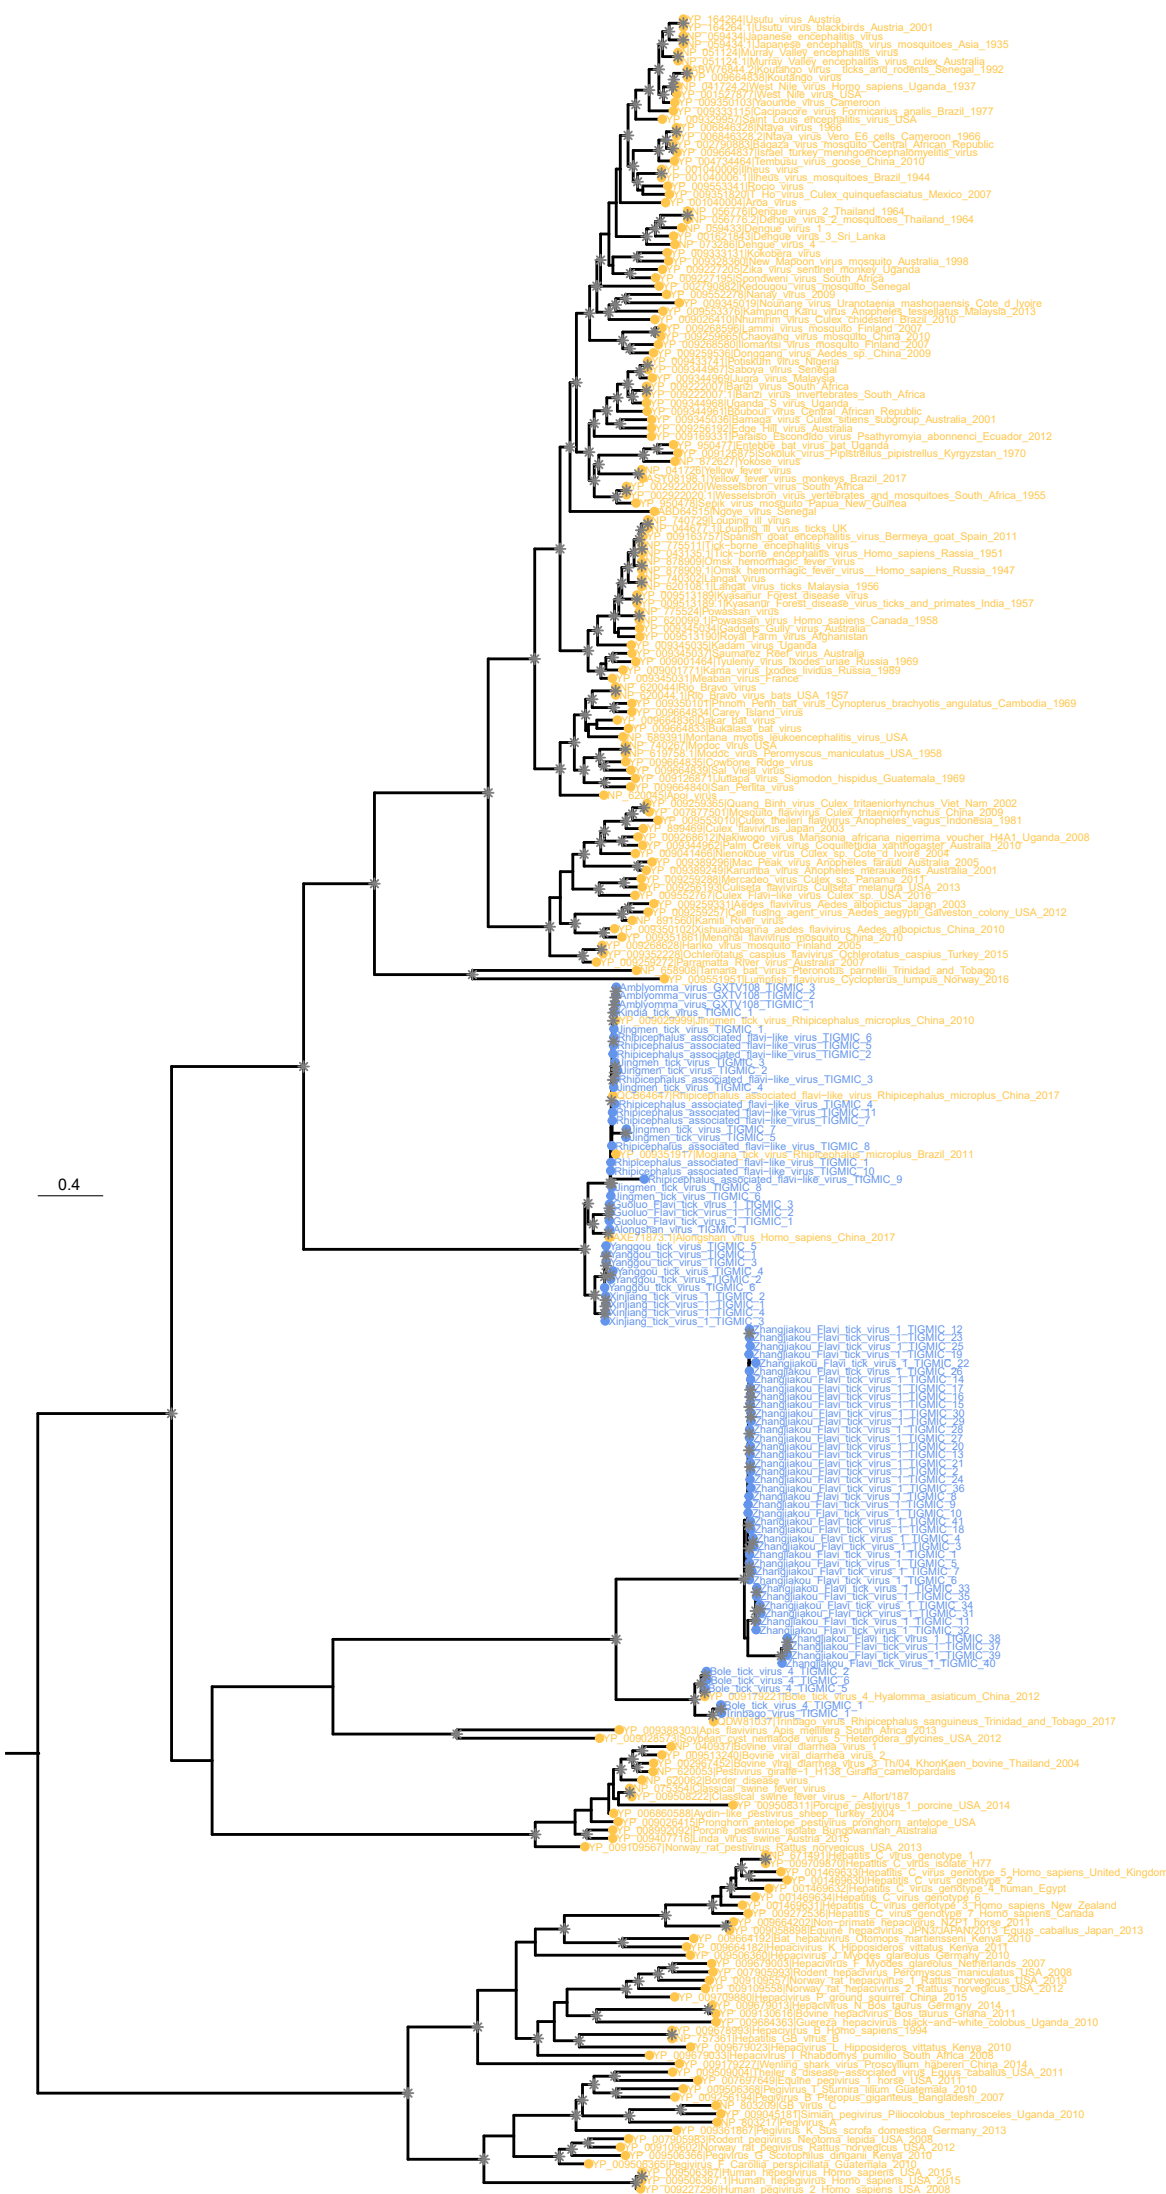

0.4

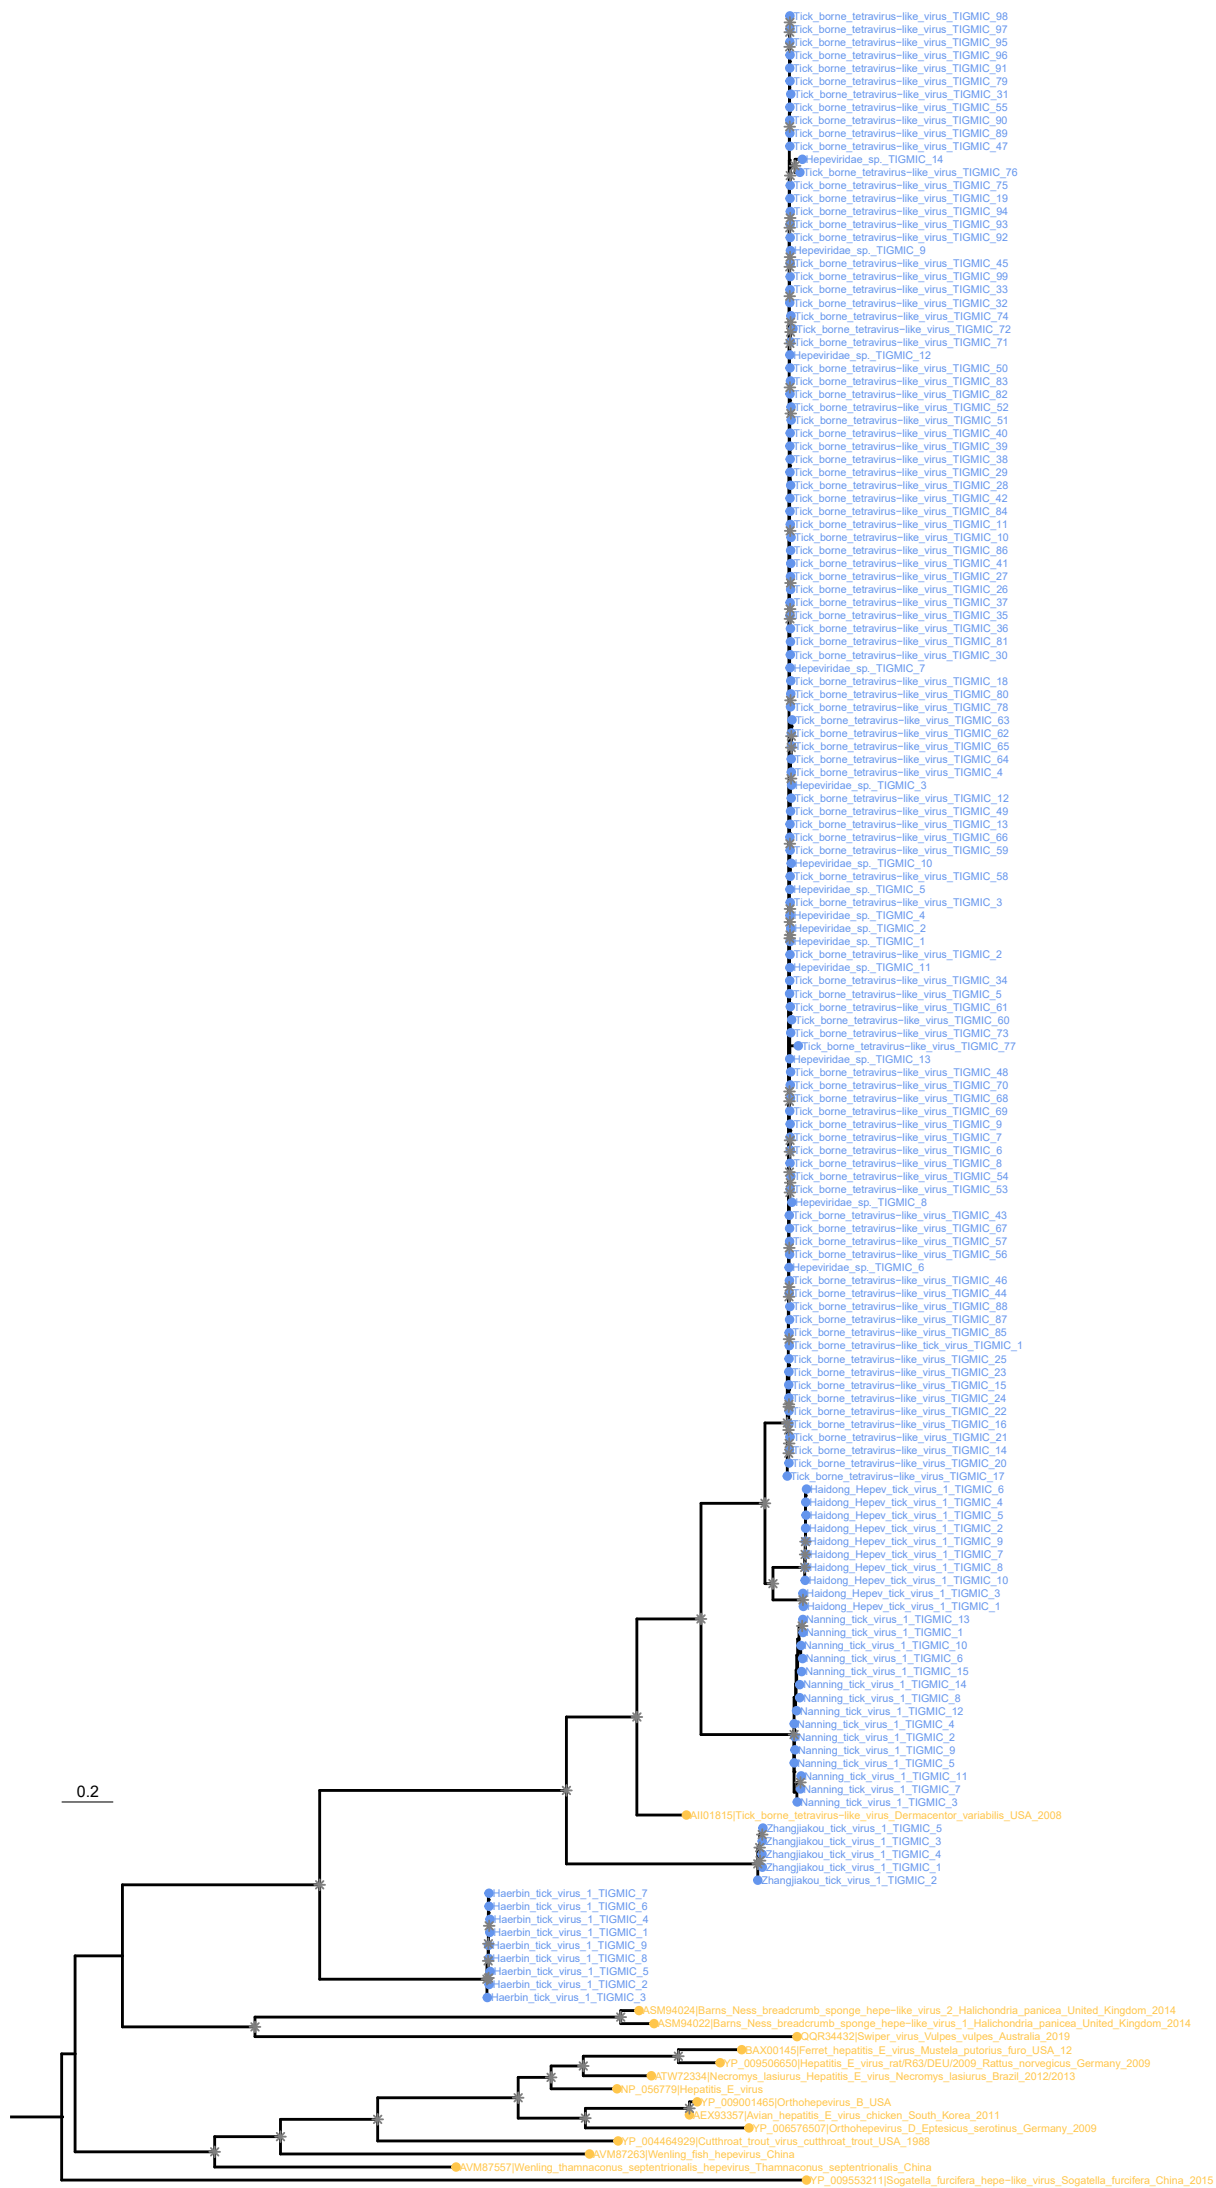



Iflaviridae

Group  
● Ref  
● Tick

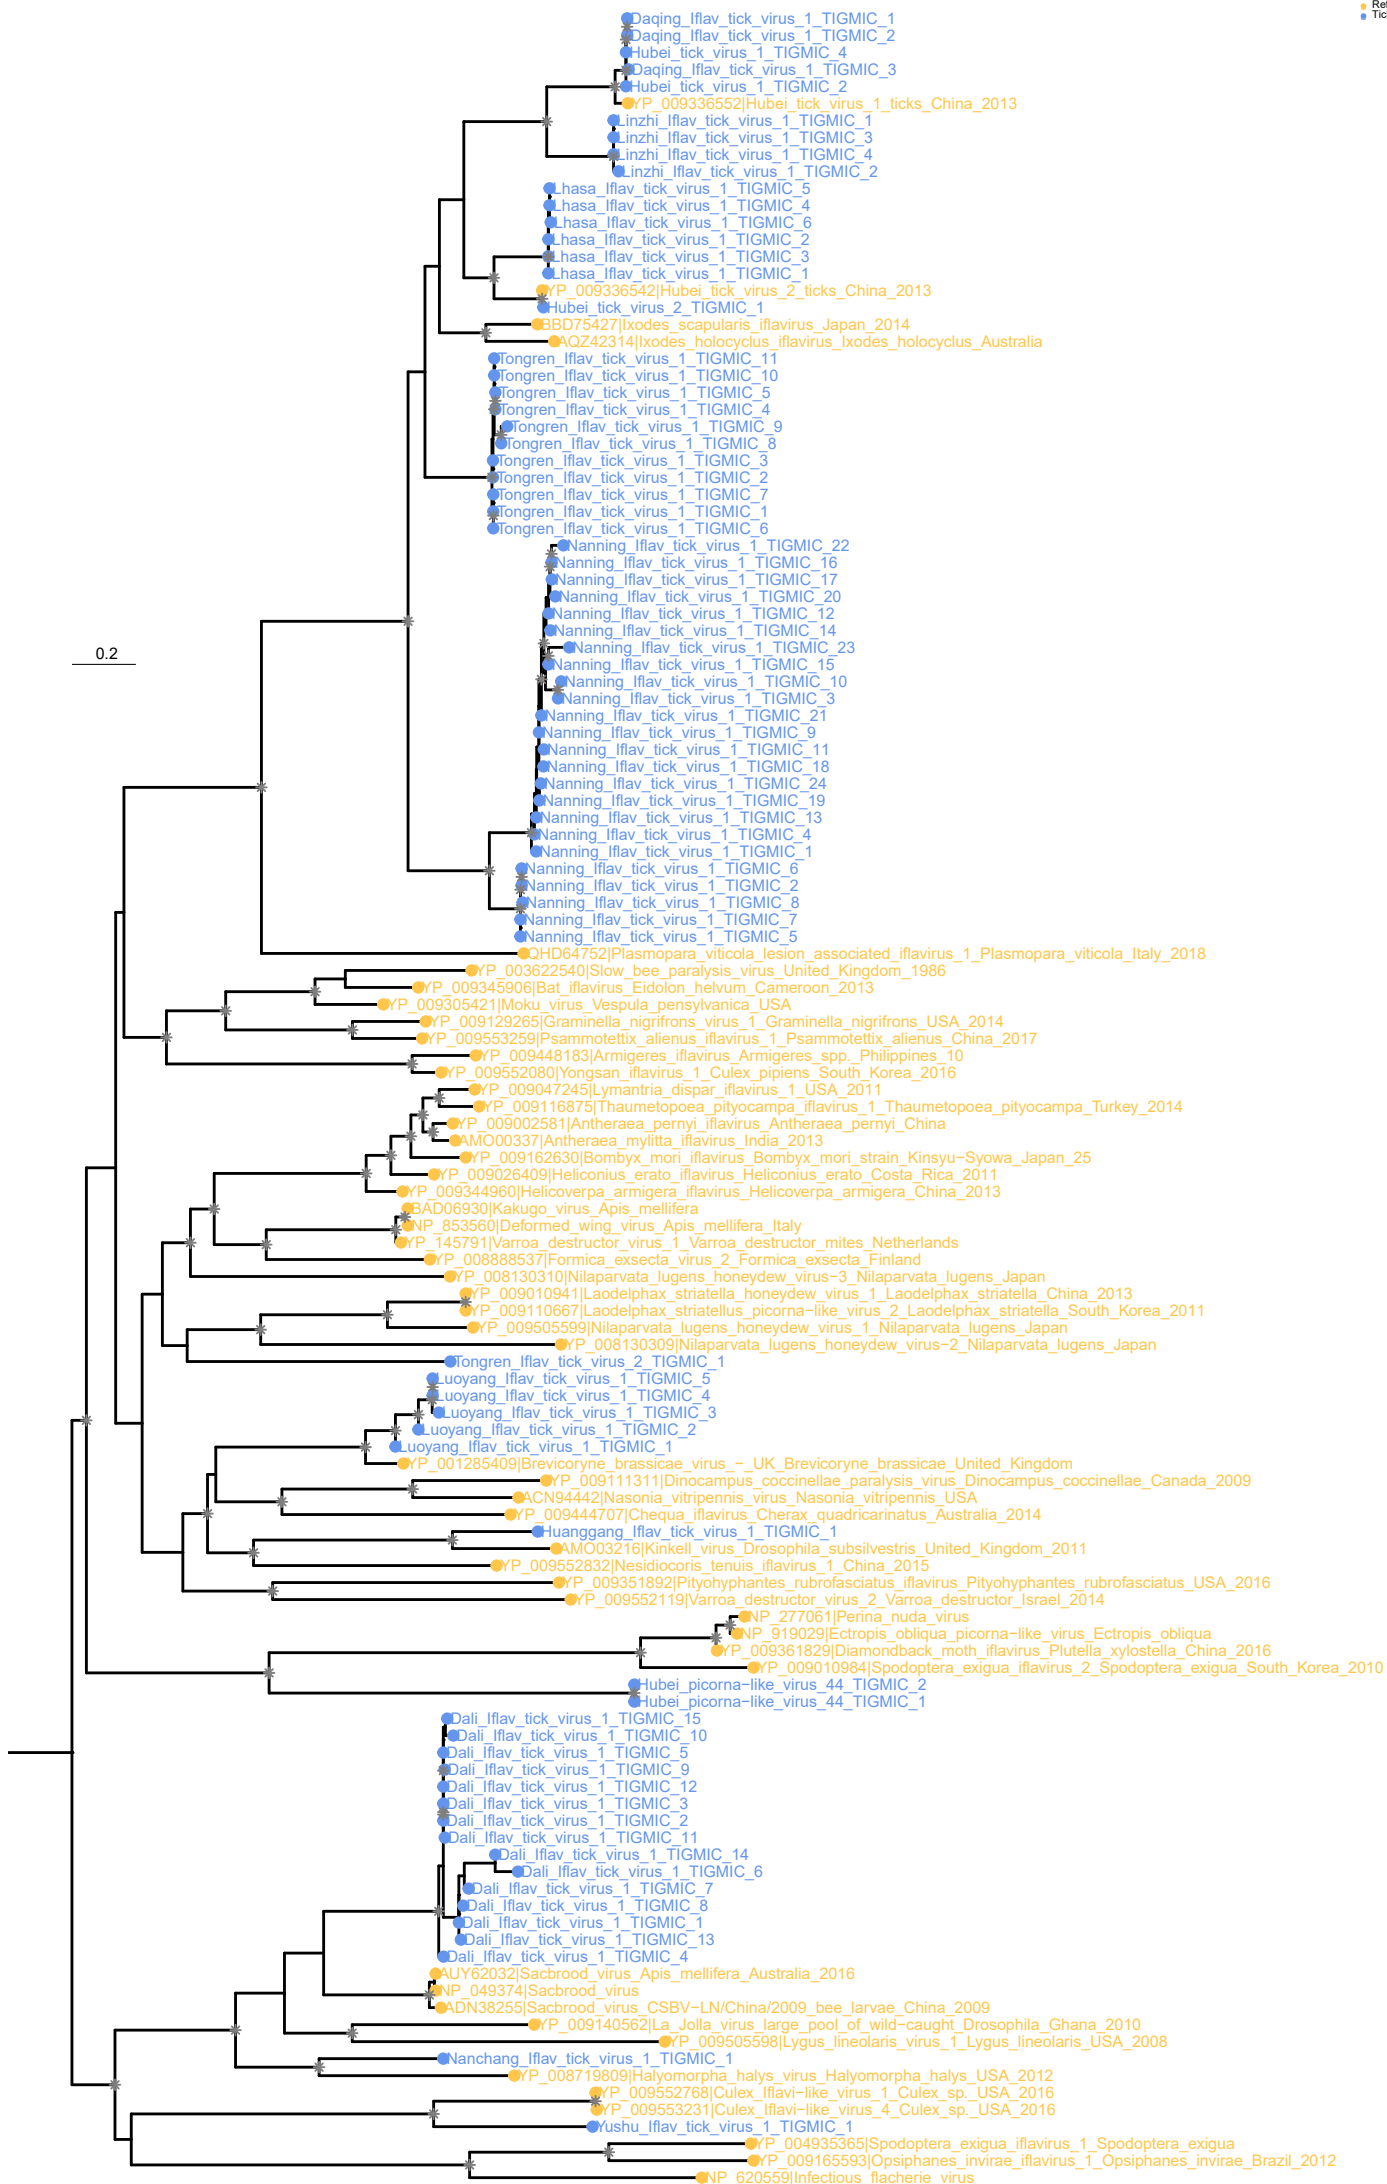

Mitoviridae

Group  
Ref

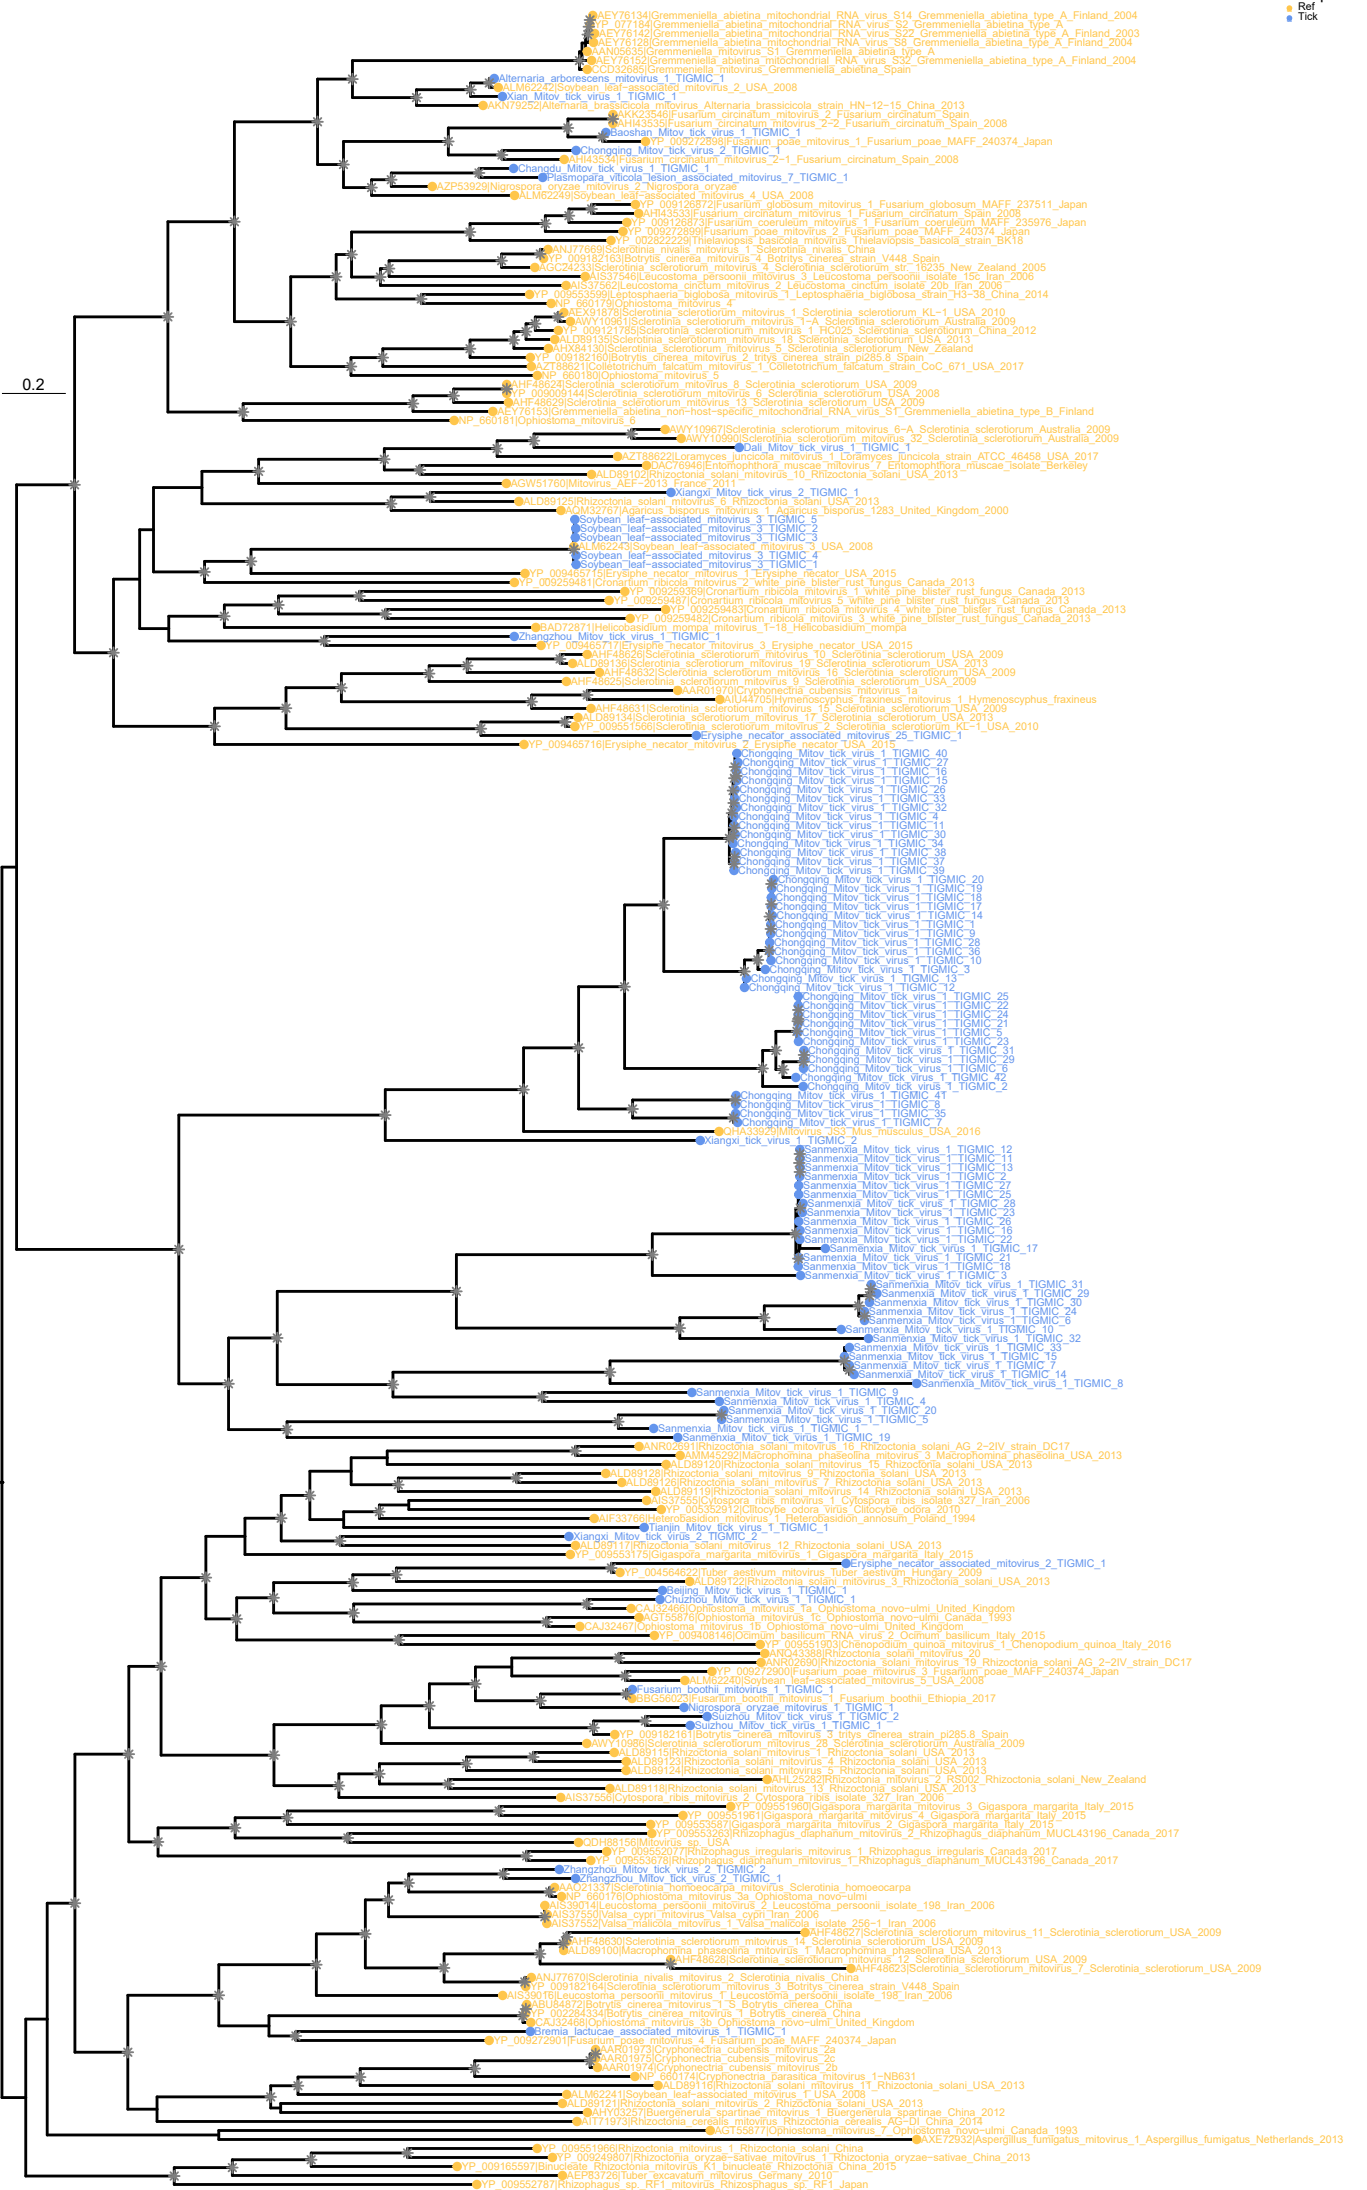

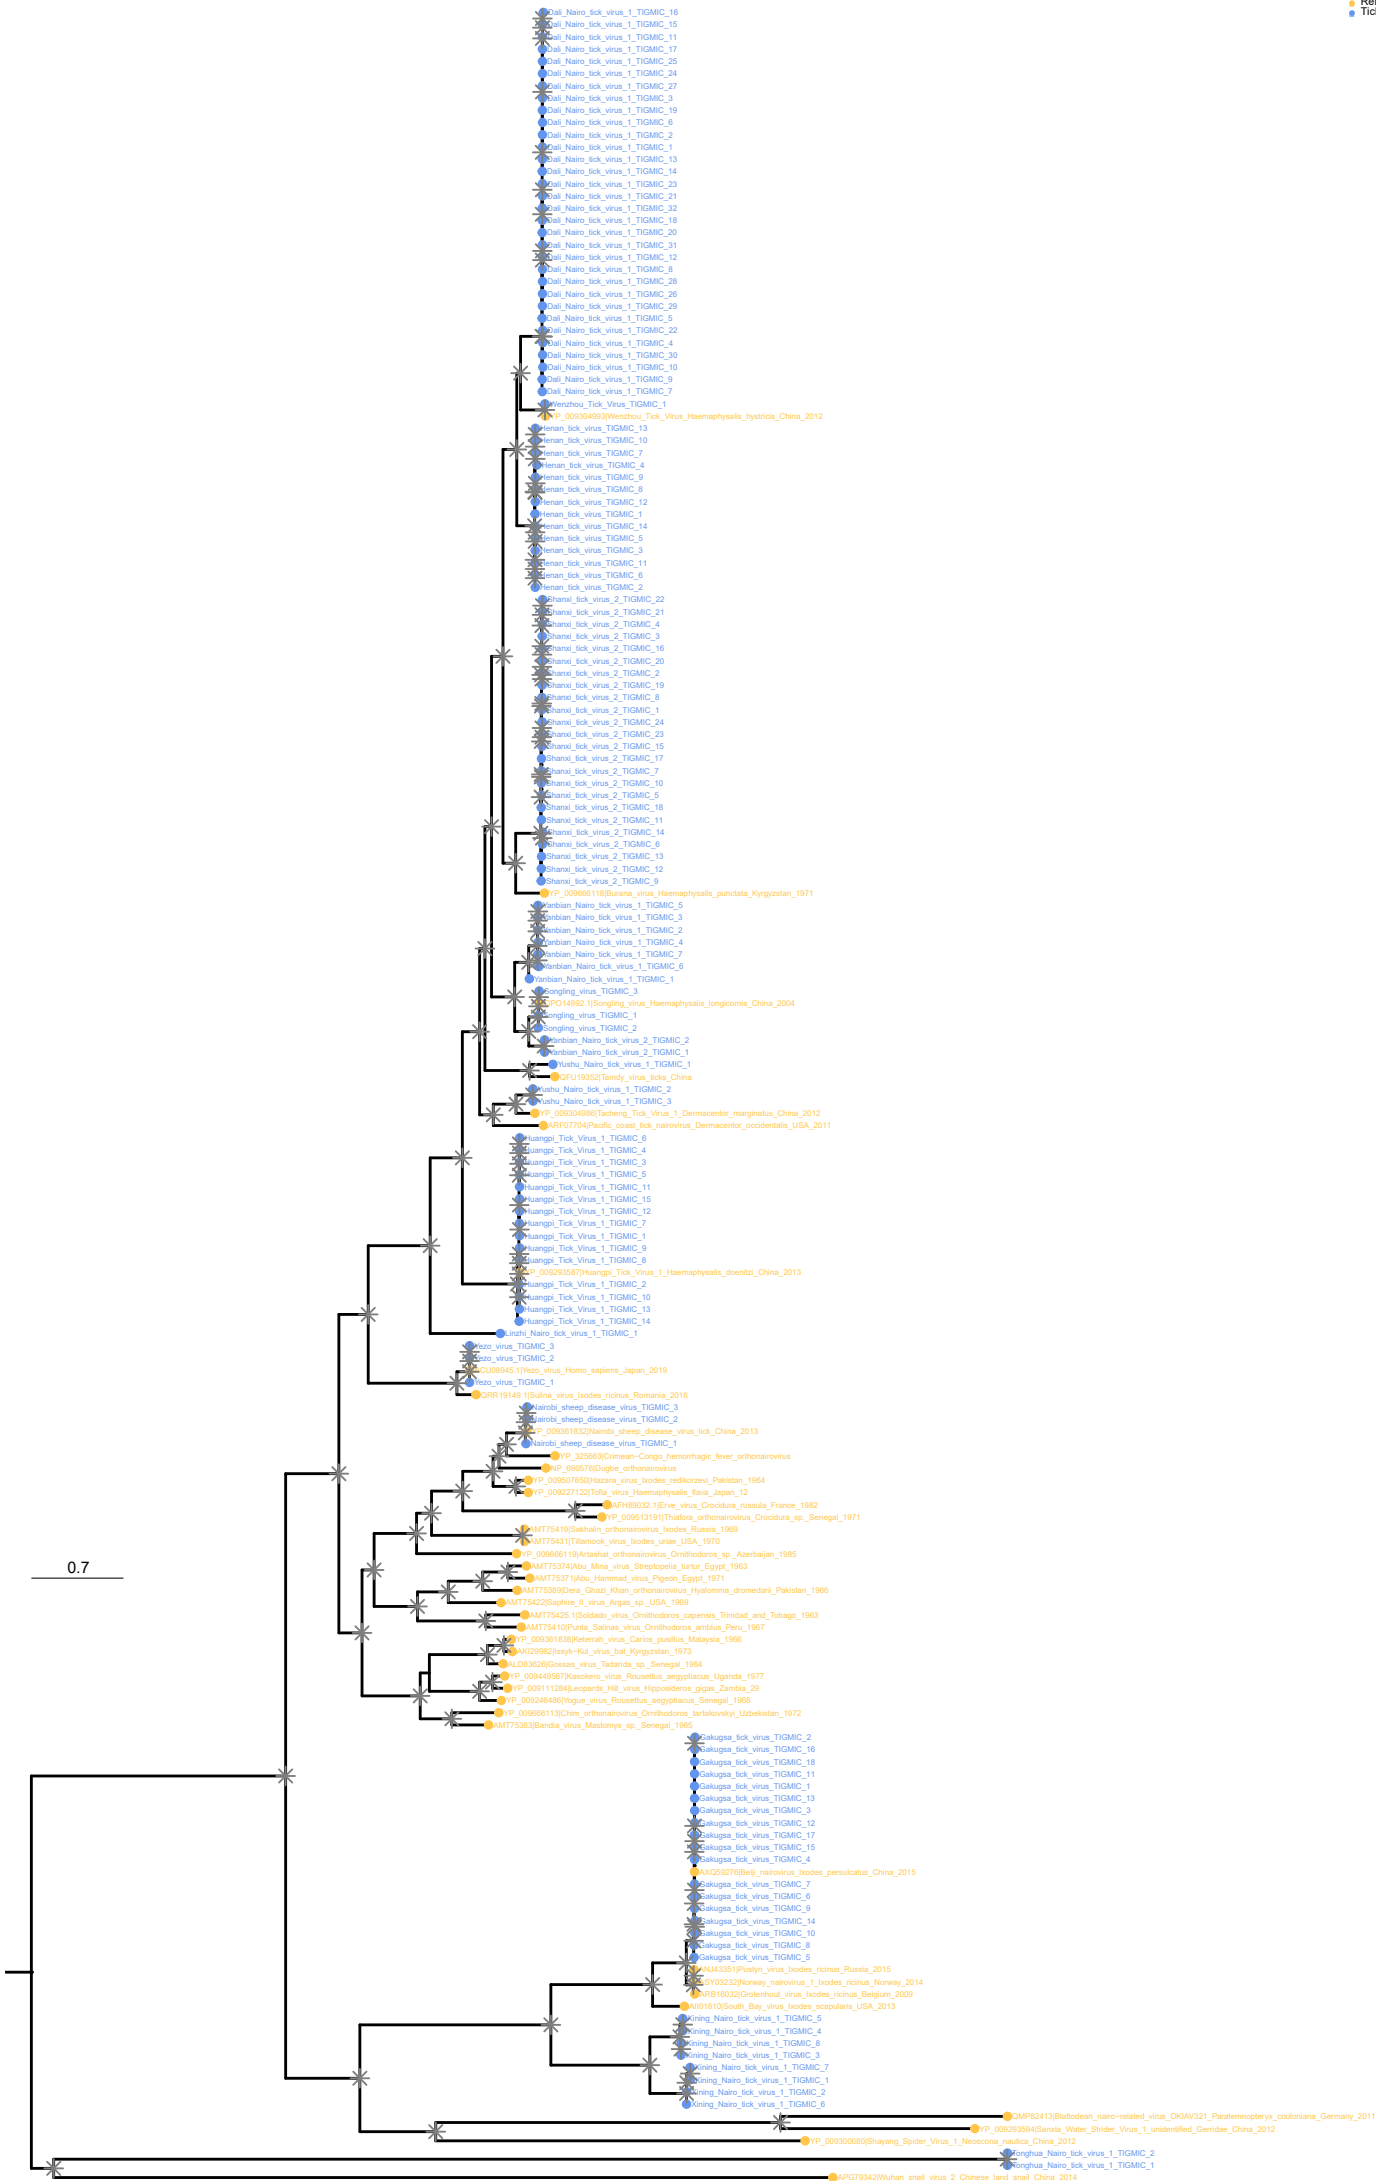



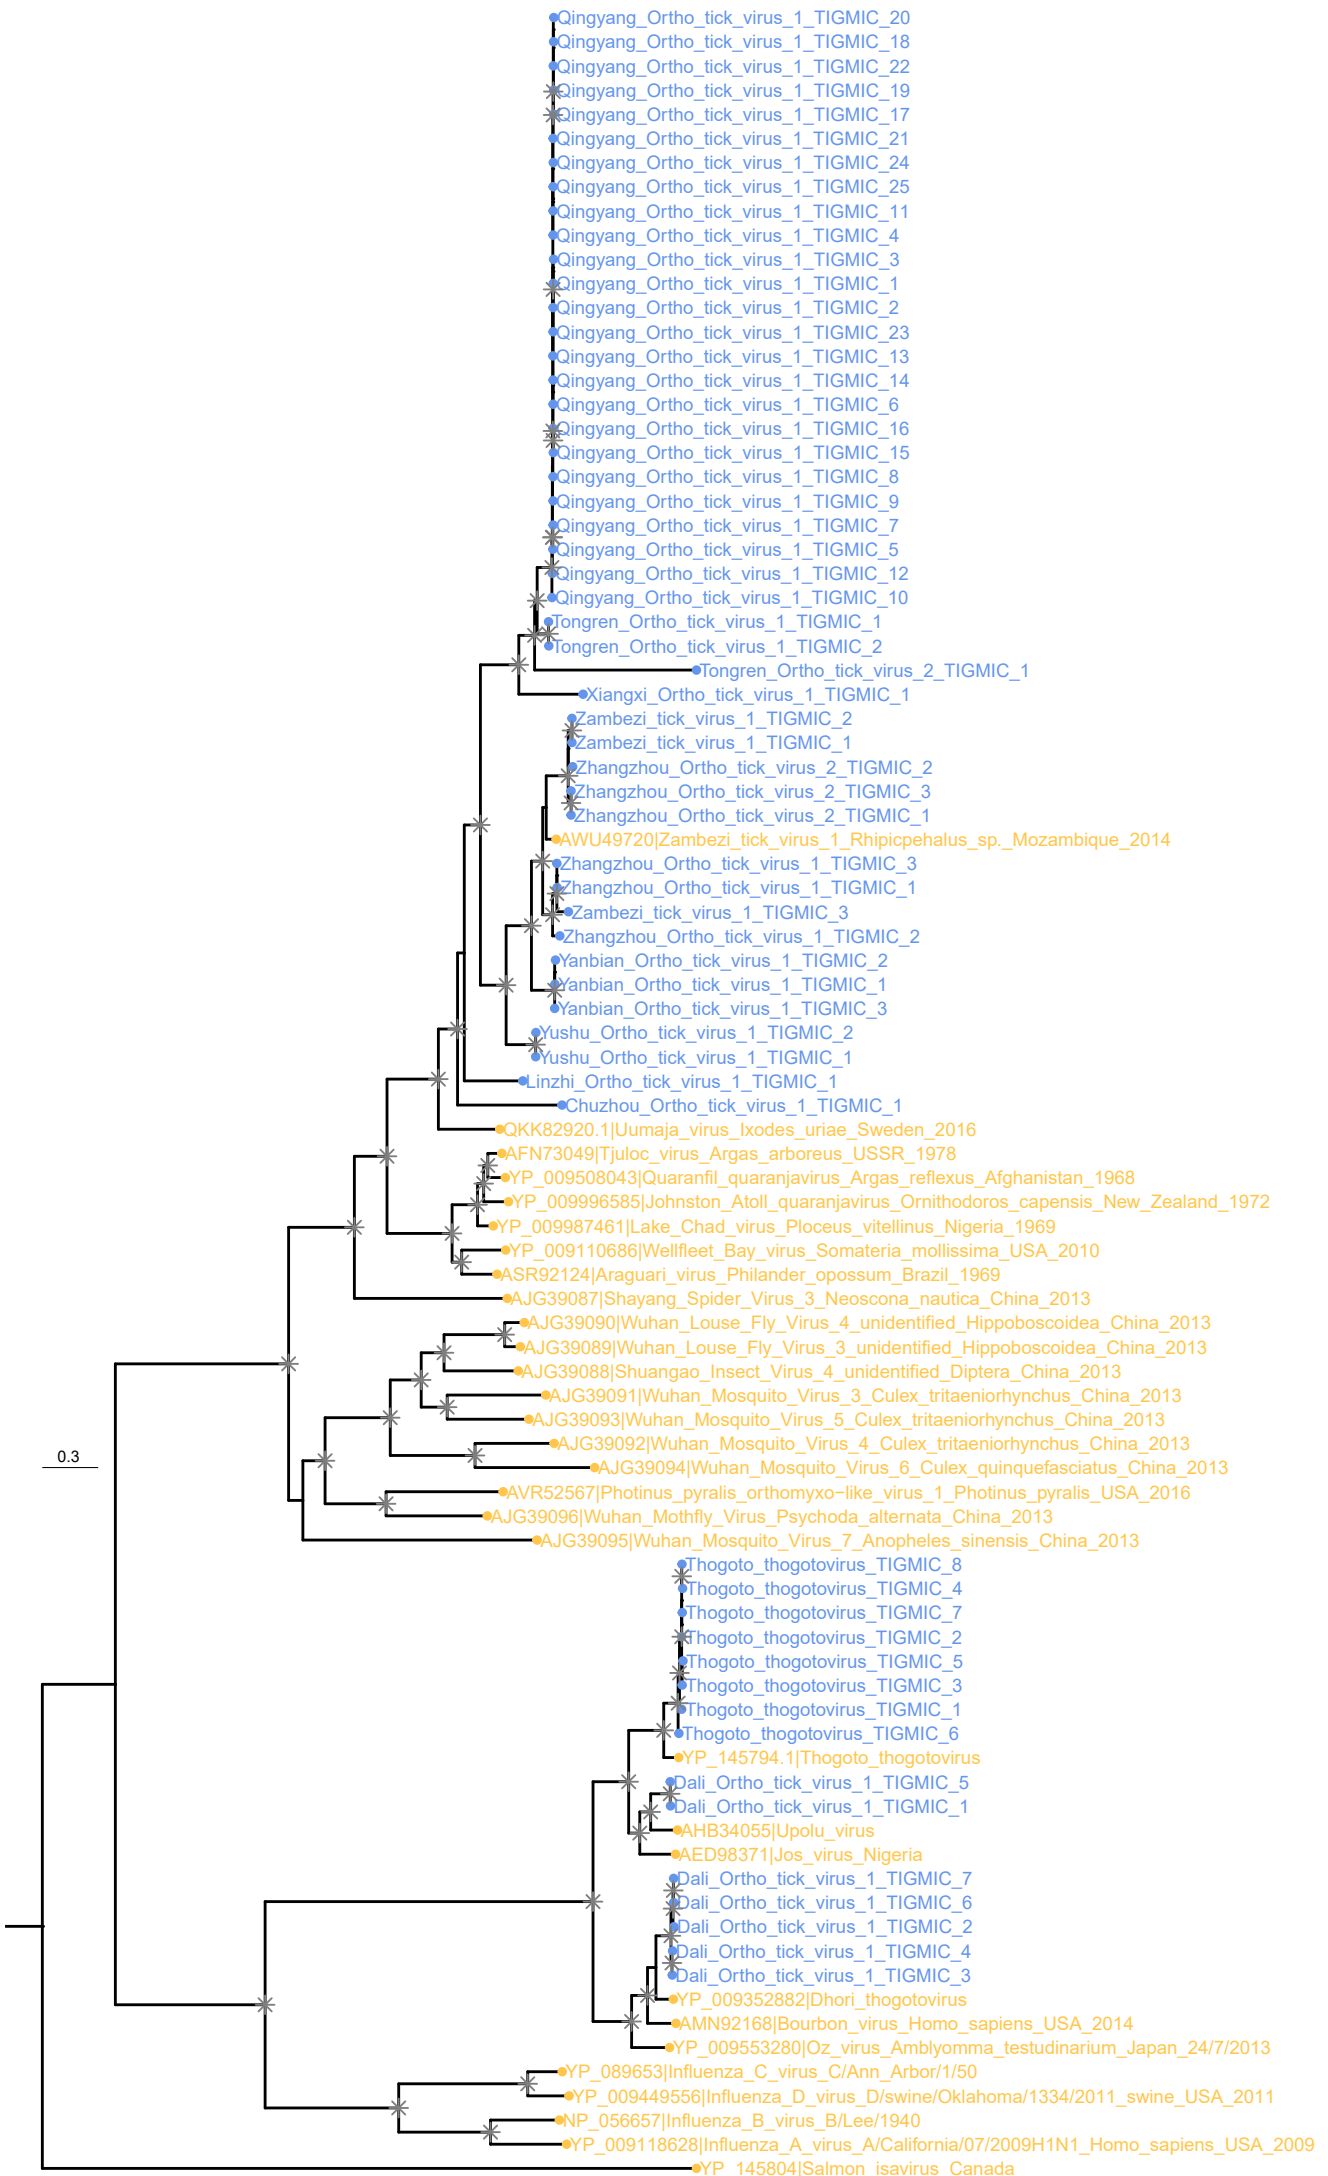

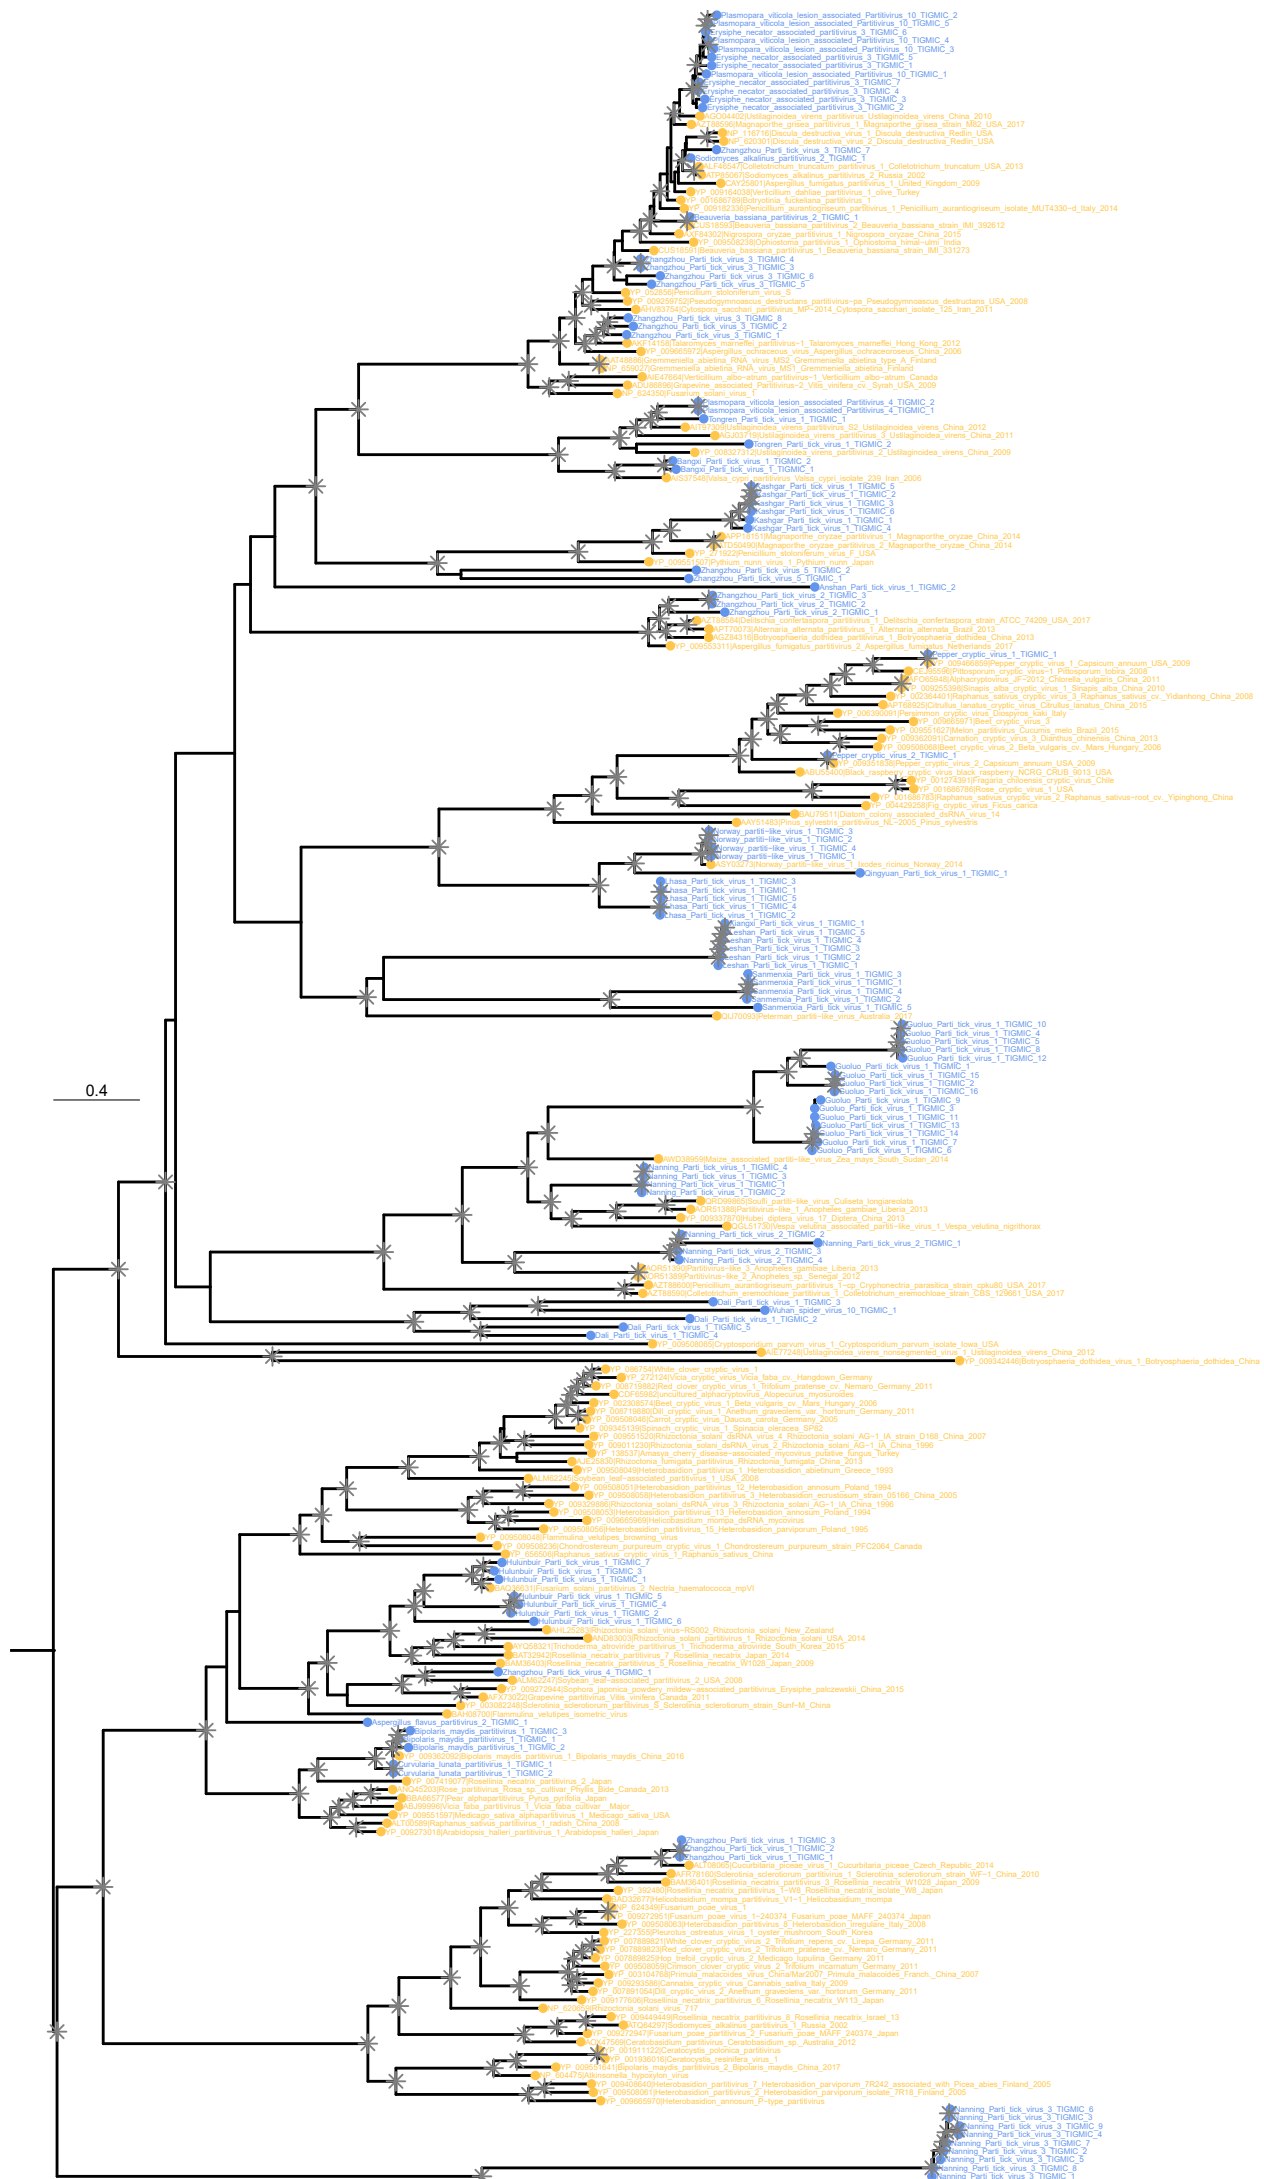

0.4



0.3

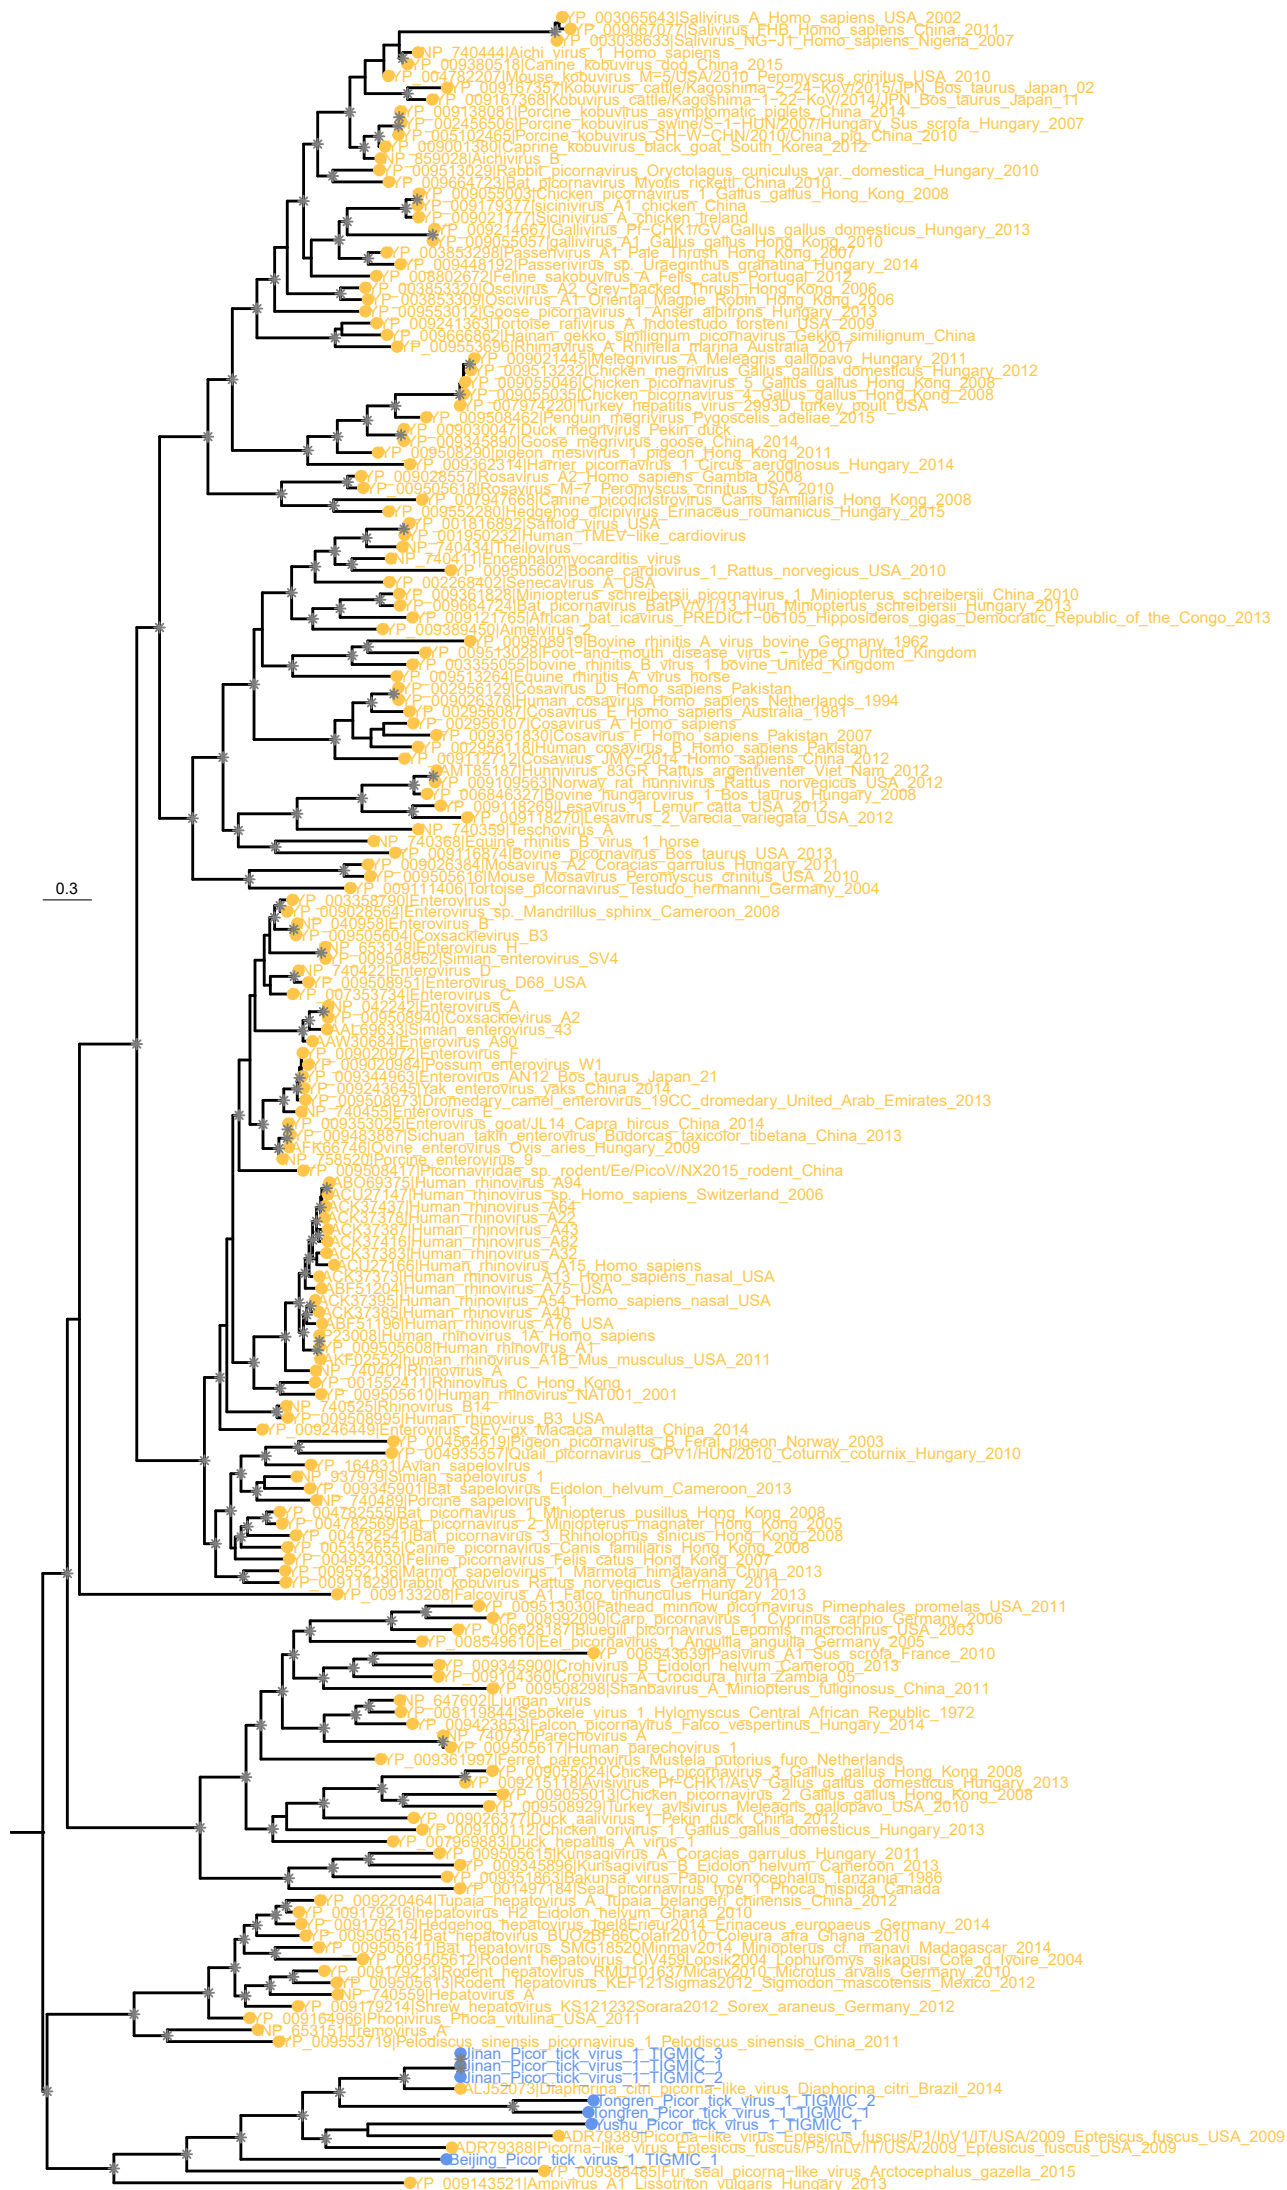



Potyviridae

Group

Ret

Trick

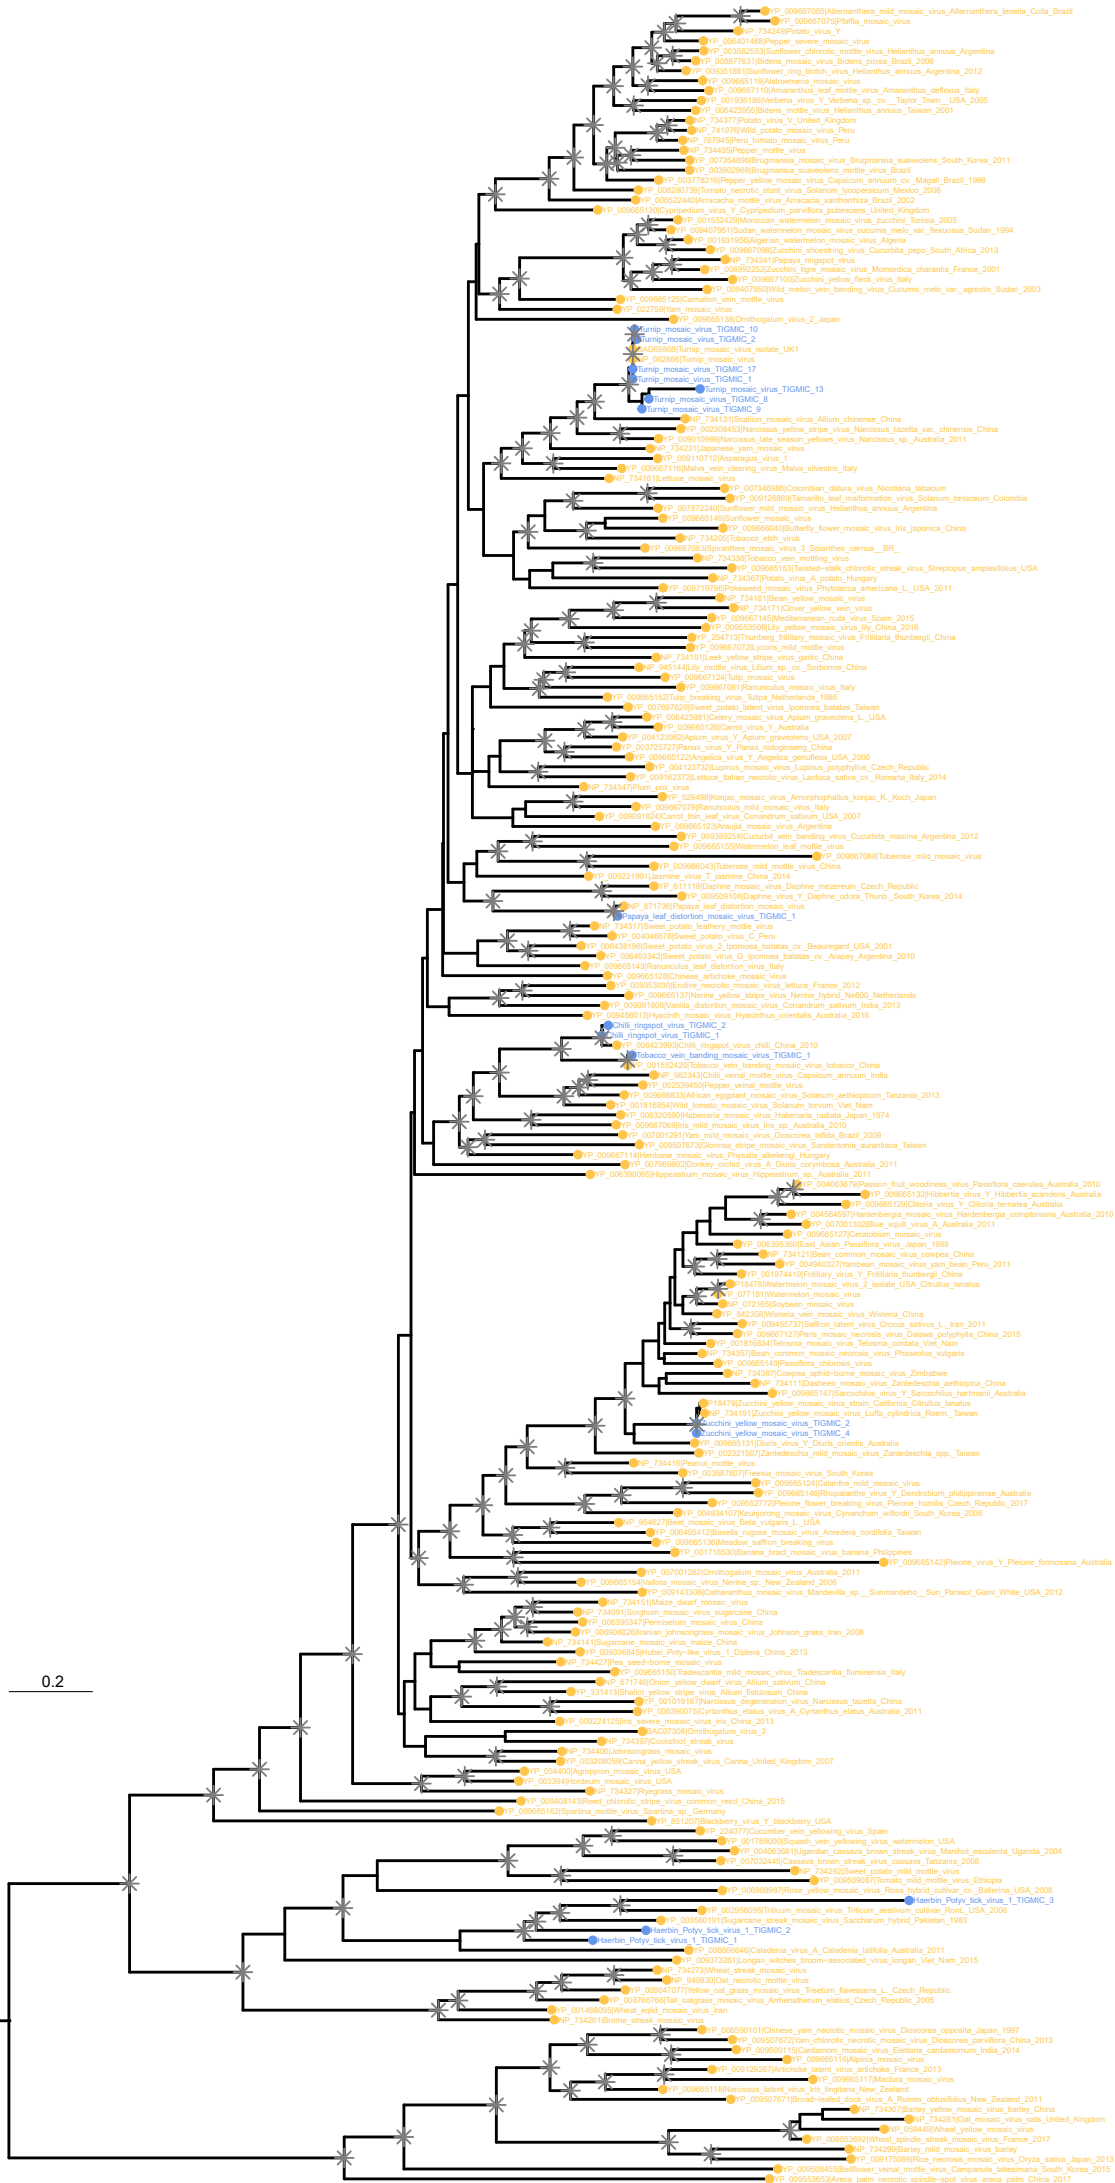

0.2

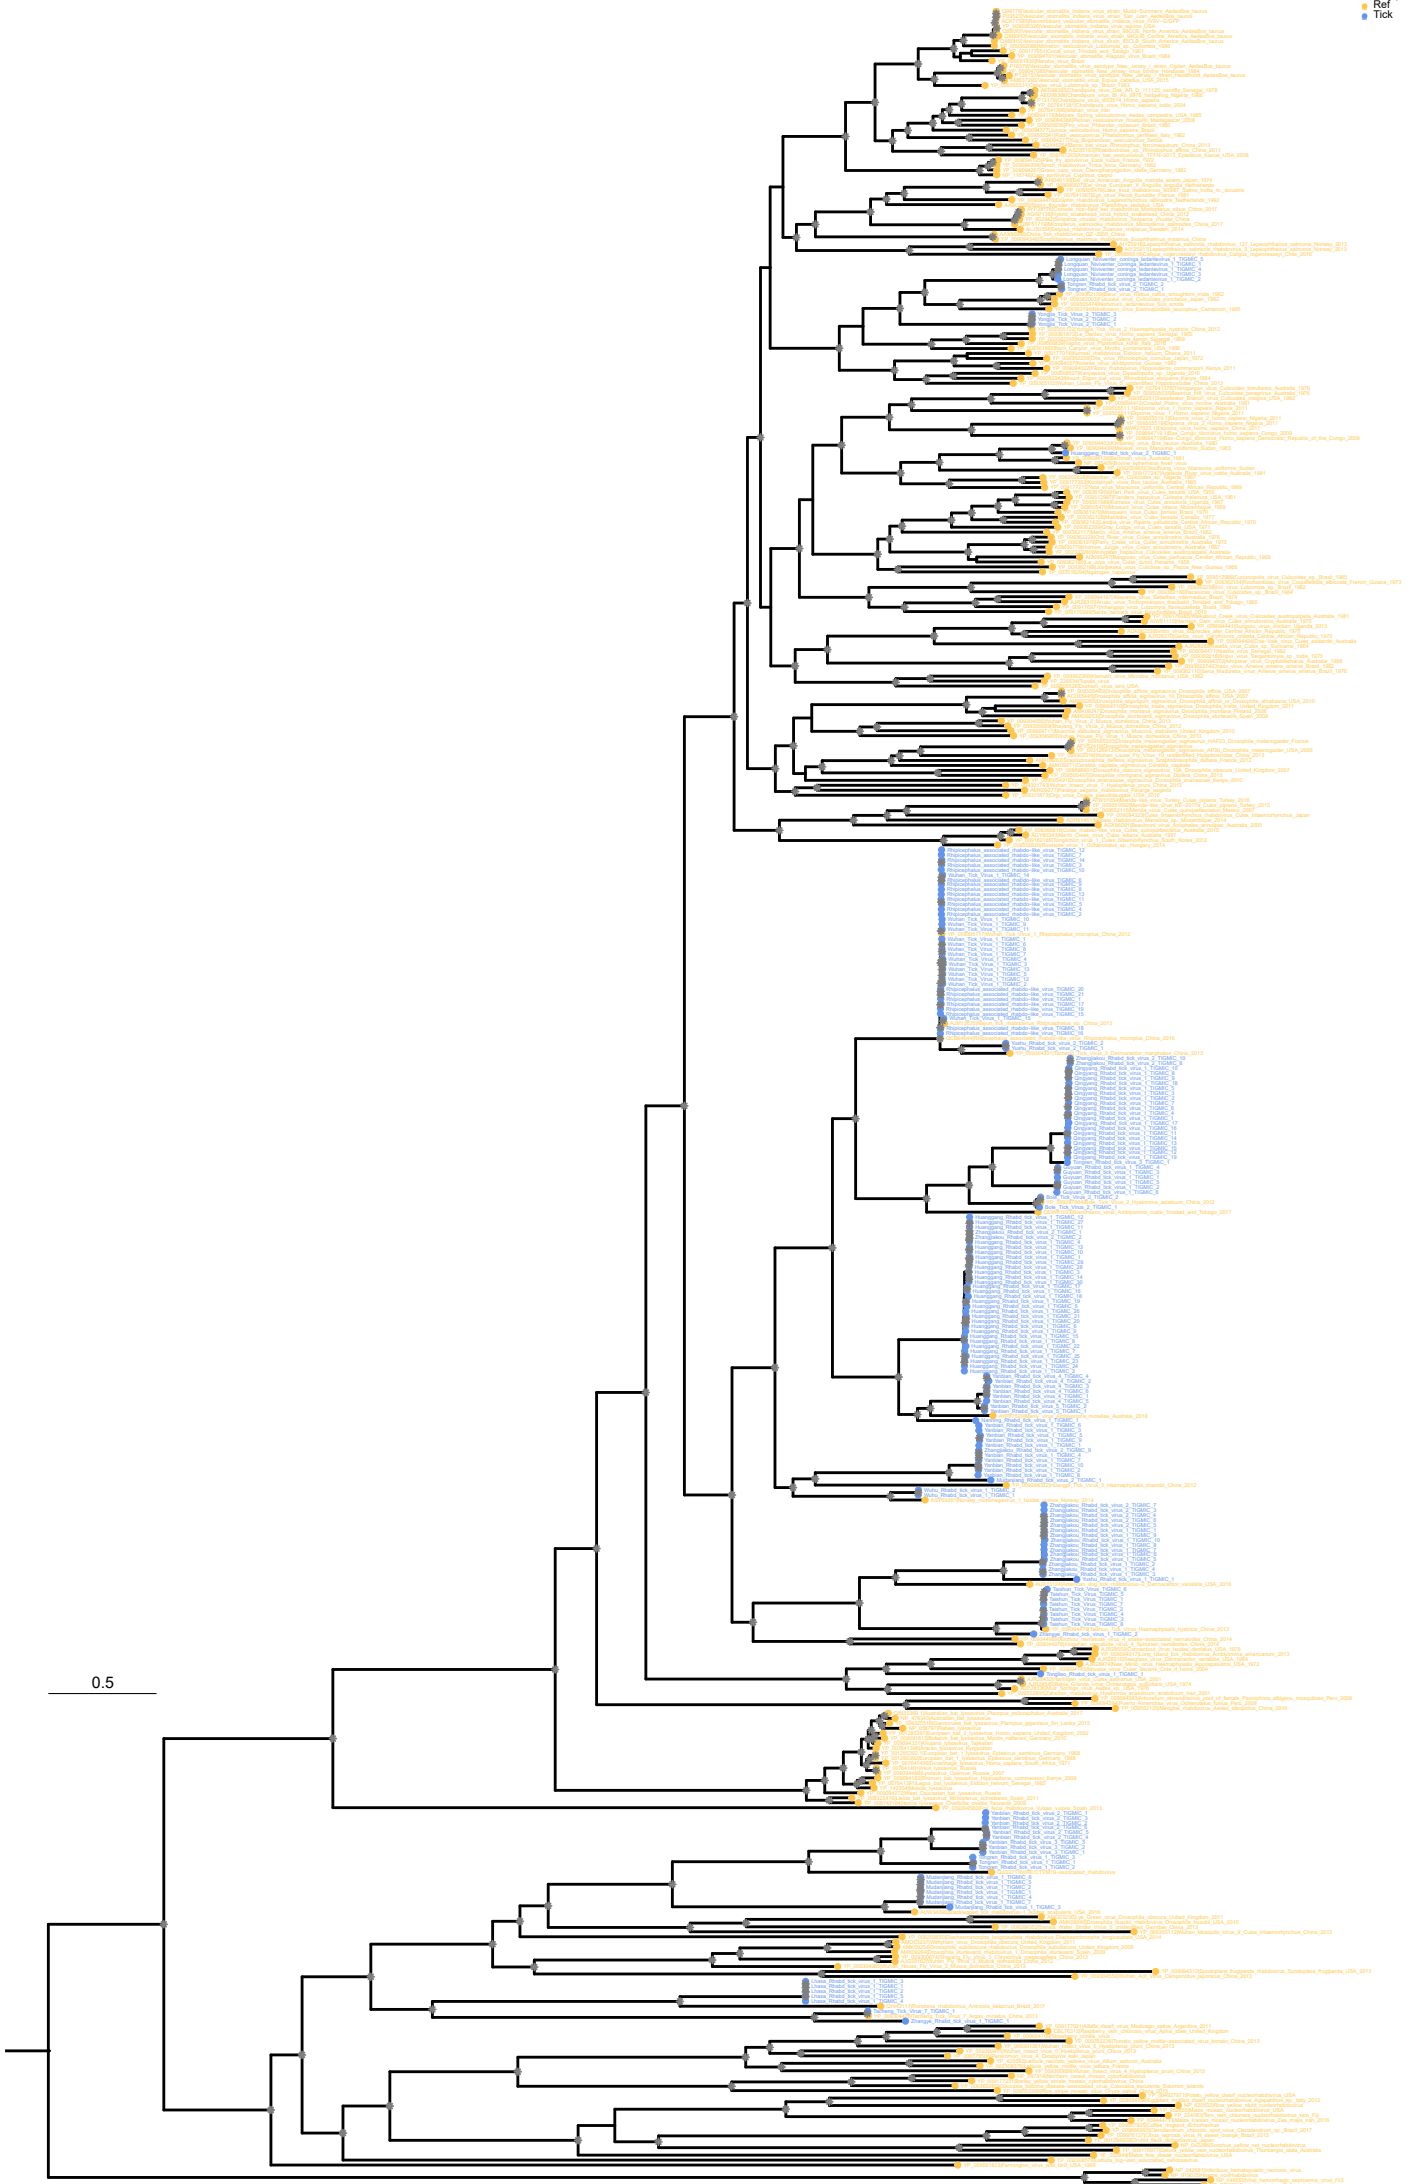

Tombusviridae

Group  
● Ref  
● Tick

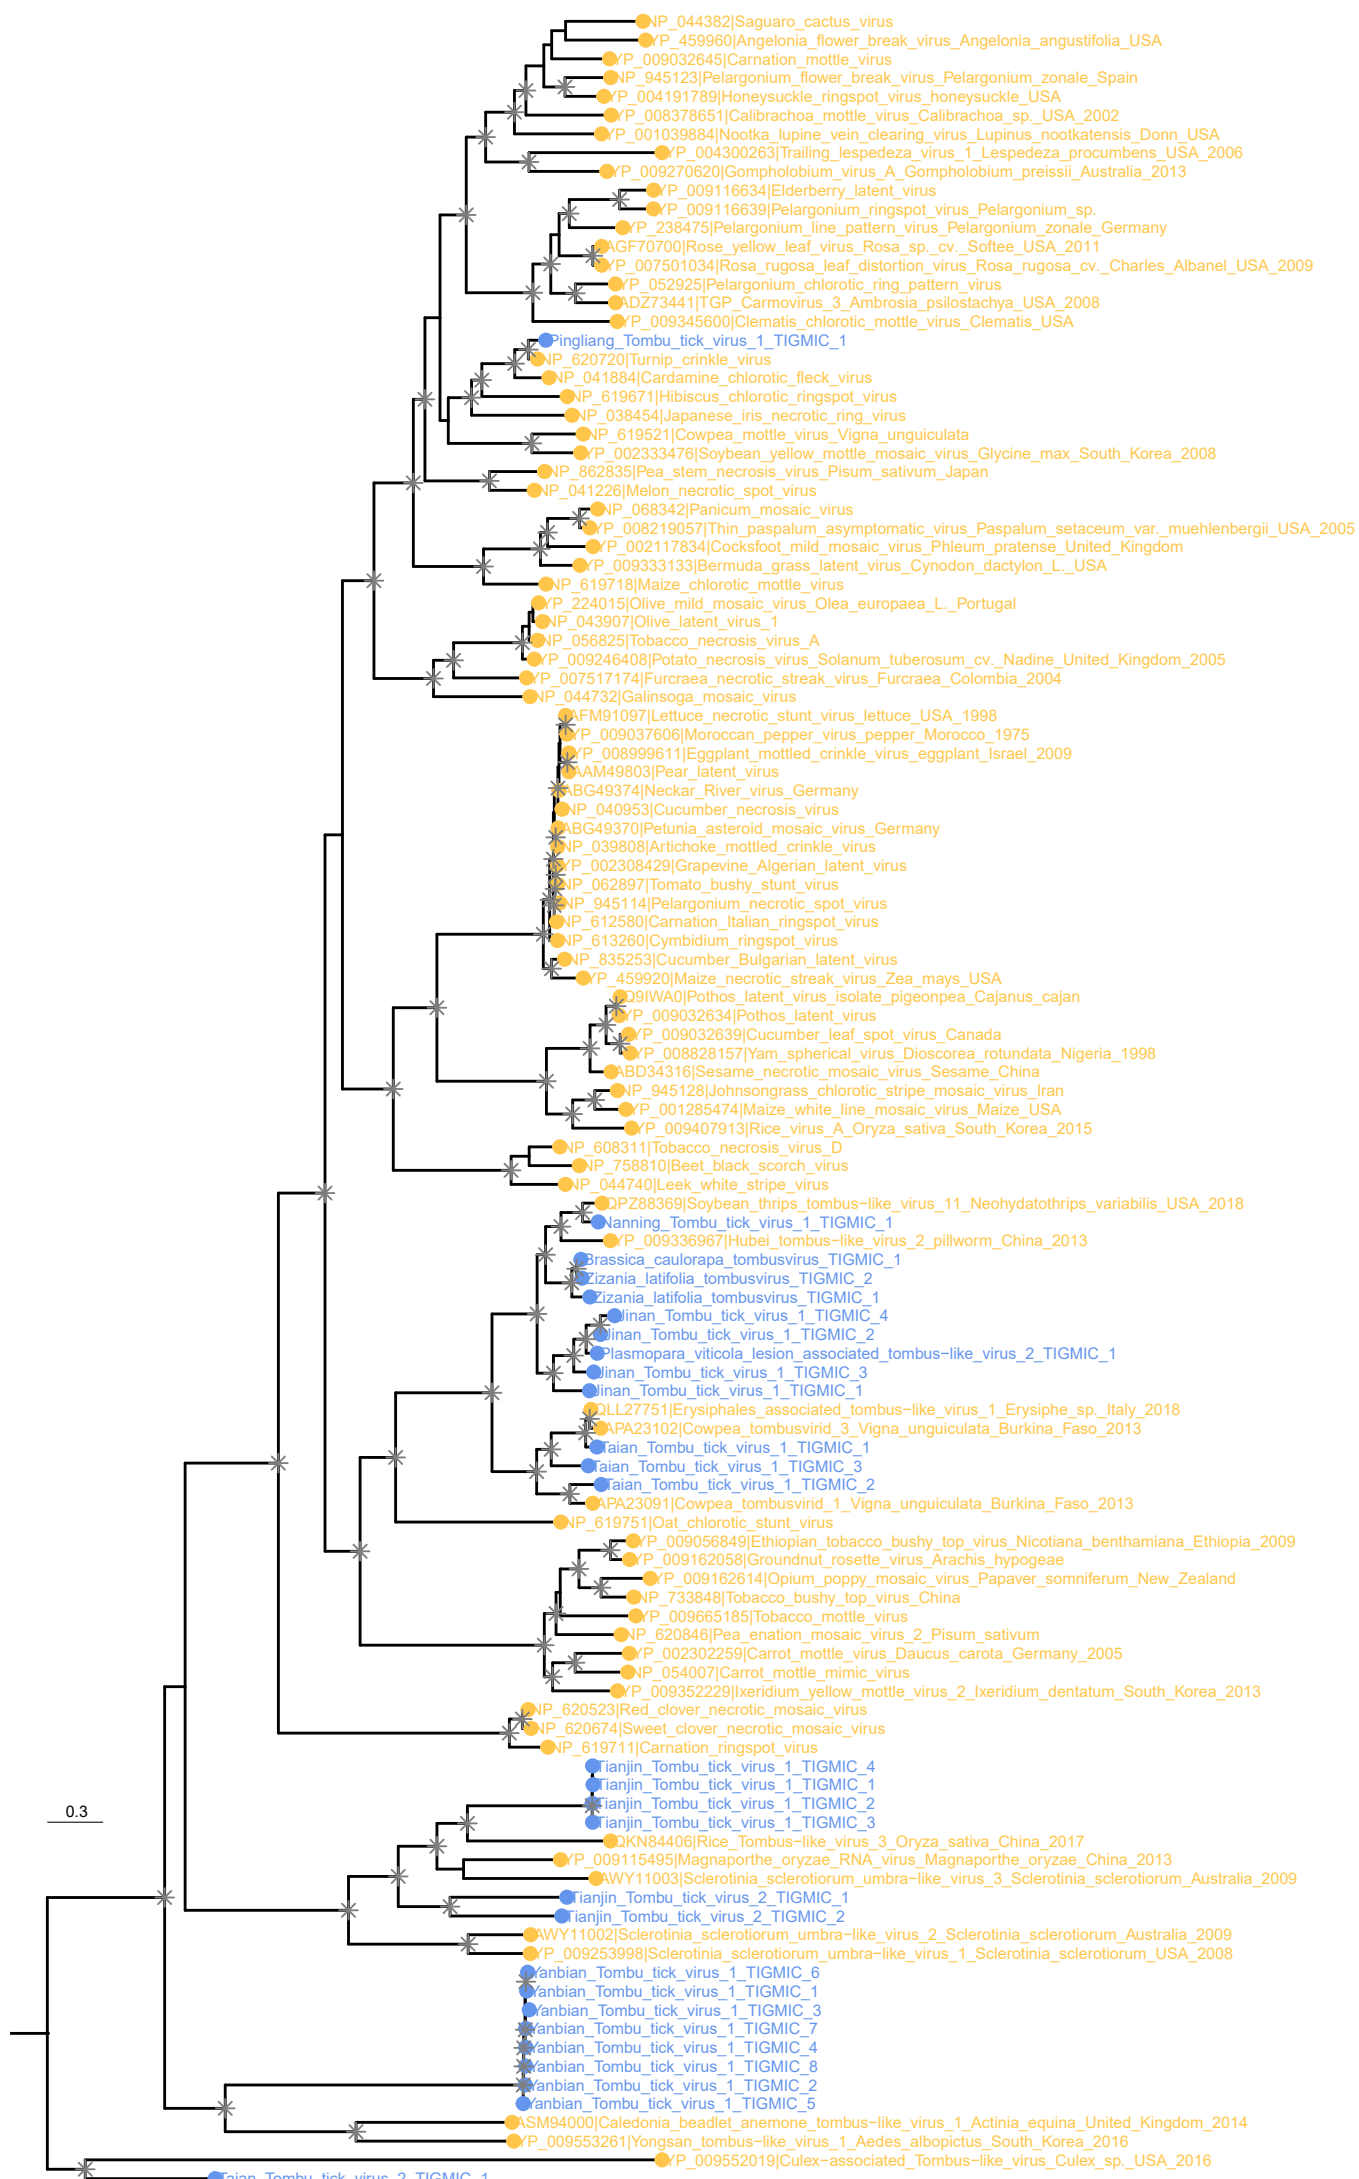

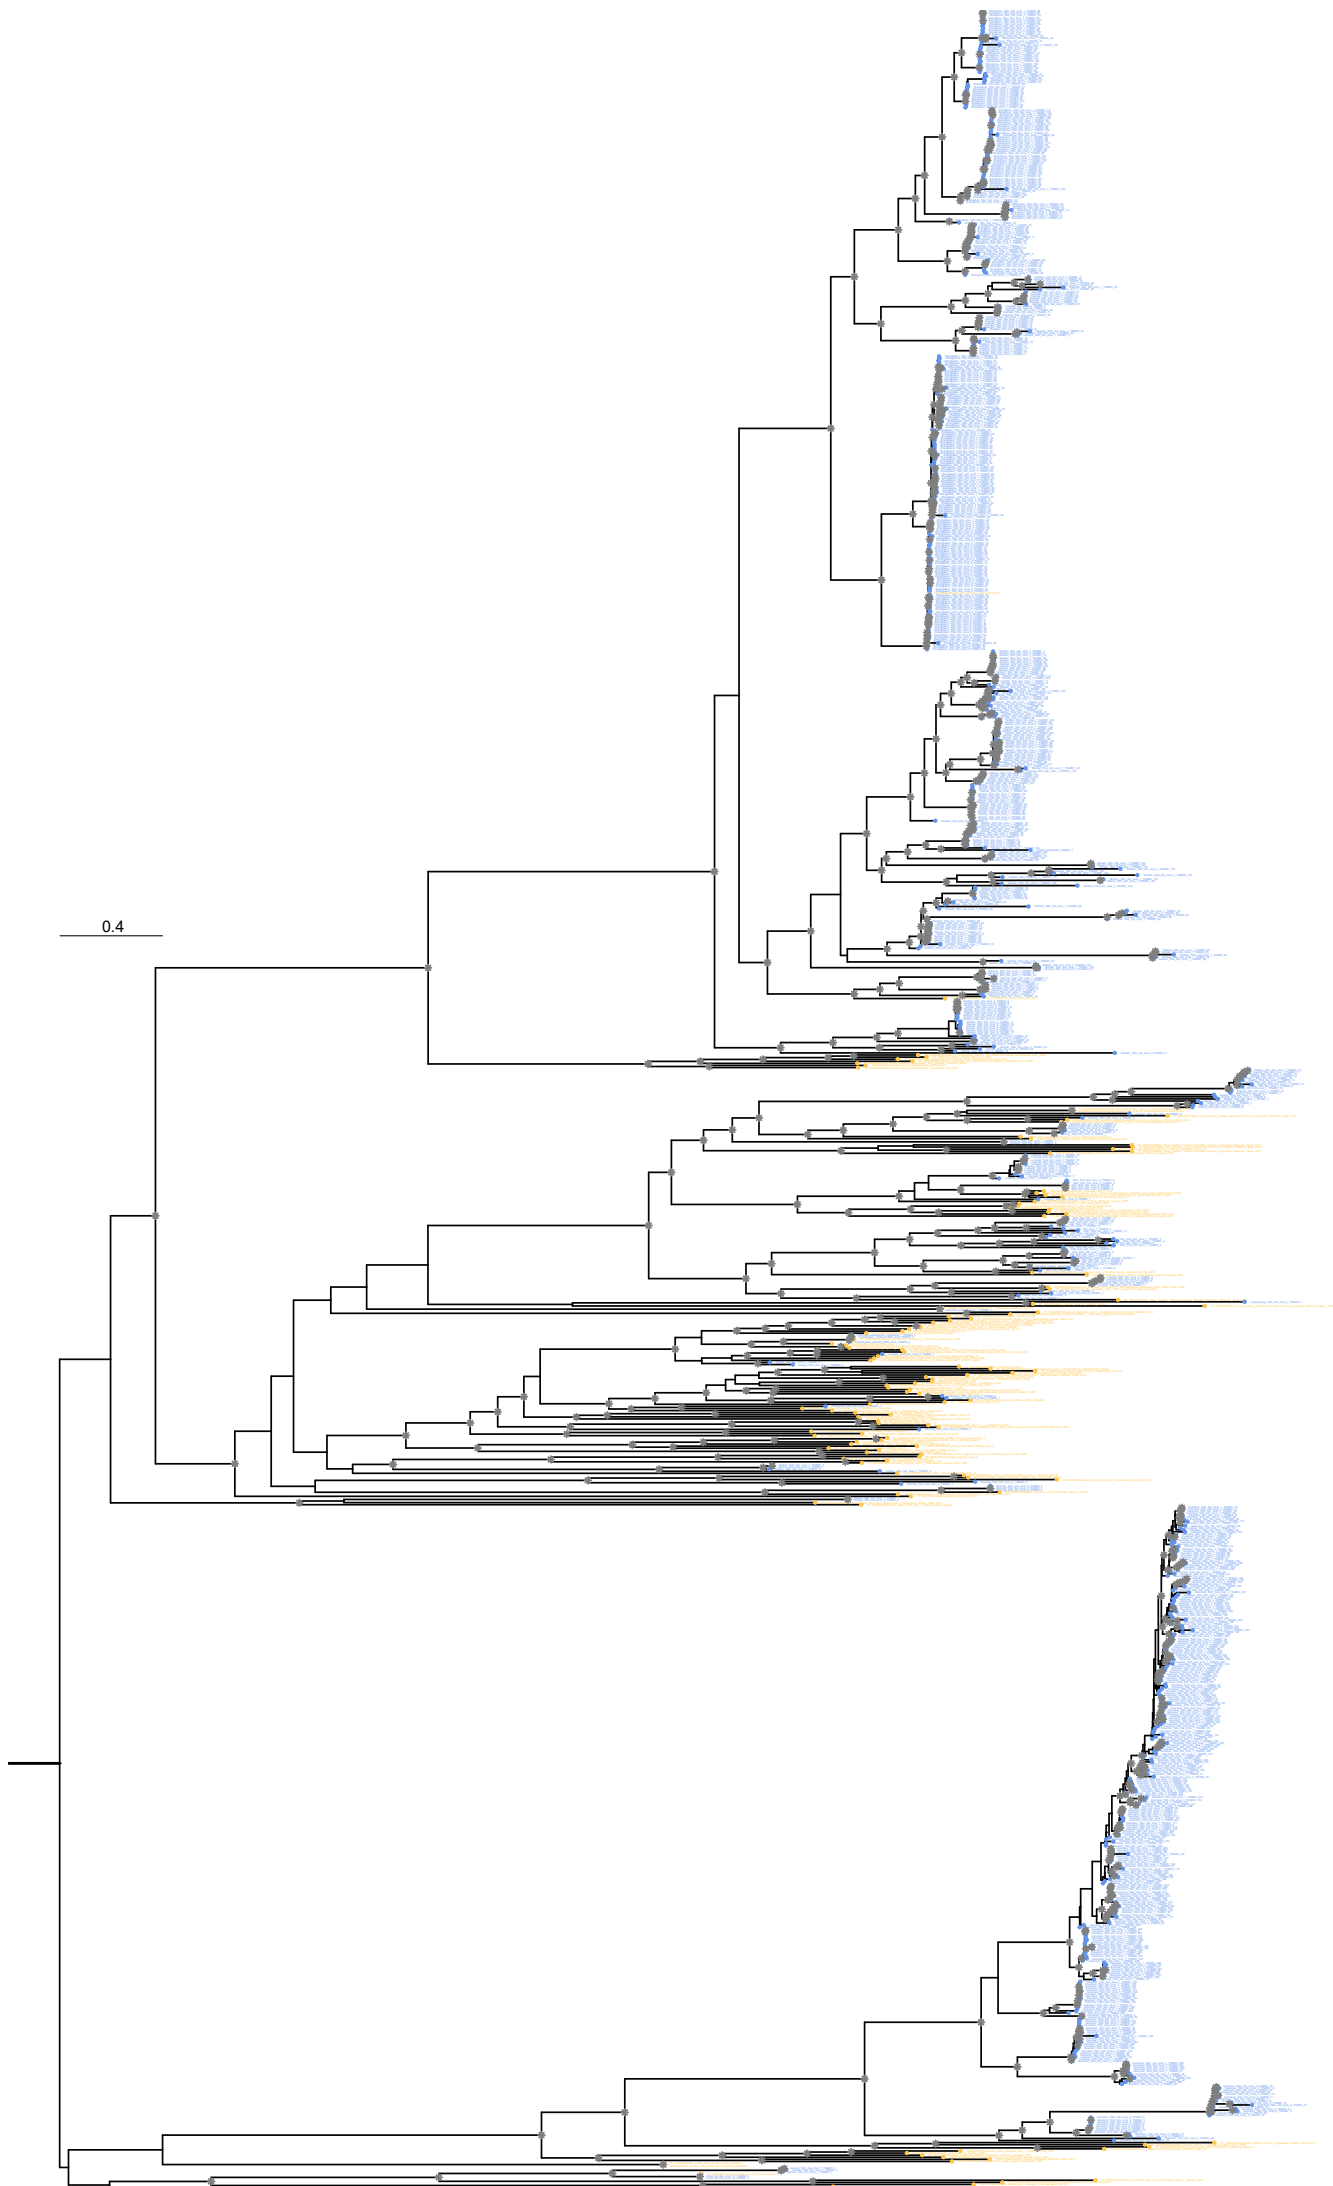

Supplement: 41564_2022_1275_MOESM1_ESM.pdf [file 41564_2022_1275_MOESM1_ESM.pdf]
